# Supplementary material for: Functional aza-boron dipyrromethenes for subcellular imaging and organelle-specific photodynamic therapy
Source: Royal Society of Chemistry journal article supplement (doi:10.1039/c8tb00593a), 2018-01-01

## Electronic Supplementary Information

### **Functional aza-boron dipyrromethenes for subcellular imaging and organelle-specific photodynamic therapy**

Qiong Wang, Dennis K. P. Ng\* and Pui-Chi Lo\*

#### Contents

- Fig. S1** Electronic absorption spectra of **7** at various concentrations in PBS (pH = 7.4) with 0.1% (v/v) Tween 80.
- Fig. S2** Electronic absorption spectra of **8** at various concentrations in PBS (pH = 7.4) with 0.1% (v/v) Tween 80.
- Fig. S3** Electronic absorption spectra of **13** at various concentrations in PBS (pH = 7.4) with 0.1% (v/v) Tween 80.
- Fig. S4** Electronic absorption spectra of **14** at various concentrations in PBS (pH = 7.4) with 0.1% (v/v) Tween 80.
- Fig. S5** Visualisation of the bright-field image and intracellular fluorescence of HepG2 cells using filter sets specific for MitoTracker and **7**, and the corresponding superimposed image.
- Fig. S6** Visualisation of the bright-field image and intracellular fluorescence of HepG2 cells using filter sets specific for LysoTracker and **8**, and the corresponding superimposed image.
- Fig. S7** Visualisation of the bright-field image and intracellular fluorescence of MCF-7 cells using filter sets specific for MitoTracker and **7**, and the corresponding superimposed image.
- Fig. S8** Visualisation of the bright-field image and intracellular fluorescence of MCF-7 cells using filter sets specific for LysoTracker and **8**, and the corresponding superimposed image.
- Fig. S9** Visualisation of the bright-field image and intracellular fluorescence of HT29 cells using filter sets specific for MitoTracker and **7**, and the corresponding superimposed image.

- Fig. S10** Visualisation of the bright-field image and intracellular fluorescence of HT29 cells using filter sets specific for LysoTracker and **8**, and the corresponding superimposed image.
- Fig. S11** Visualisation of the bright-field image and intracellular fluorescence of HepG2 cells using filter sets specific for LysoTracker and **14**, and the corresponding superimposed image.
- Fig. S12** Visualisation of the bright-field image and intracellular fluorescence of MCF-7 cells using filter sets specific for LysoTracker and **14**, and the corresponding superimposed image.
- Fig. S13** Visualisation of the bright-field image and intracellular fluorescence of HT29 cells using filter sets specific for LysoTracker and **14**, and the corresponding superimposed image.

$^1\text{H}$  and  $^{13}\text{C}\{^1\text{H}\}$  NMR spectra of all the new compounds

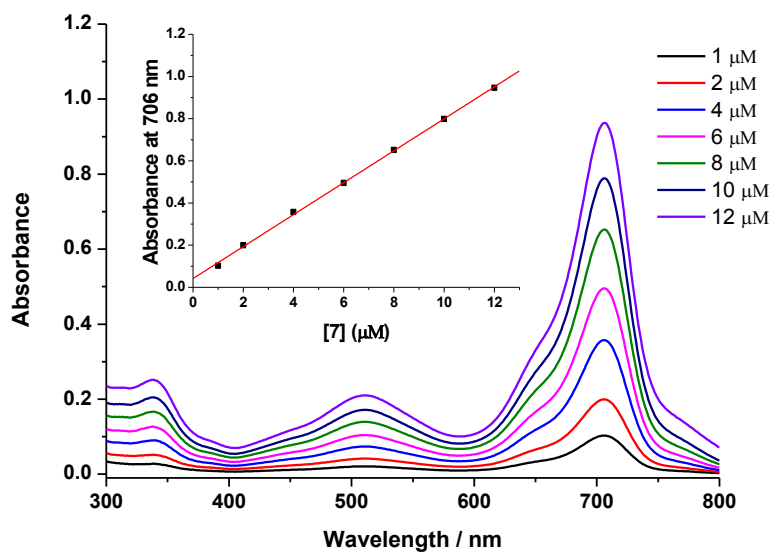

**Fig. S1** Electronic absorption spectra of **7** at various concentrations in PBS (pH = 7.4) with 0.1% (v/v) Tween 80. The inset plots the Q-band absorbance versus the concentration of **7**.

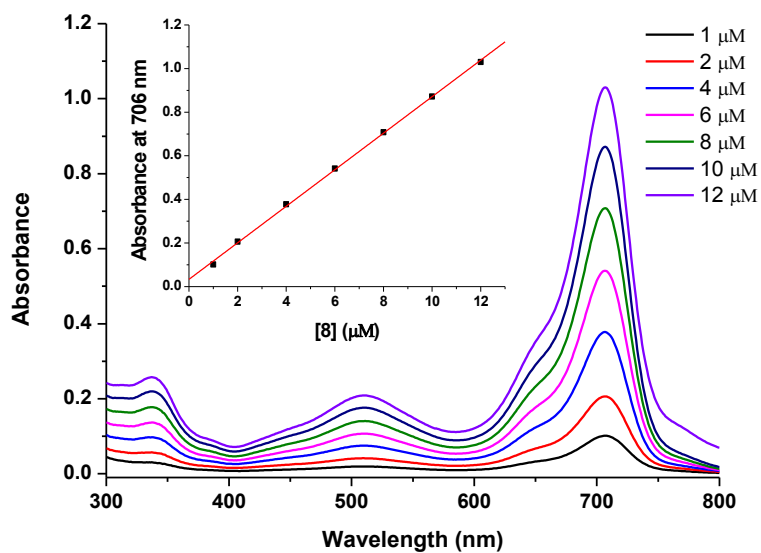

**Fig. S2** Electronic absorption spectra of **8** at various concentrations in PBS (pH = 7.4) with 0.1% (v/v) Tween 80. The inset plots the Q-band absorbance versus the concentration of **8**.

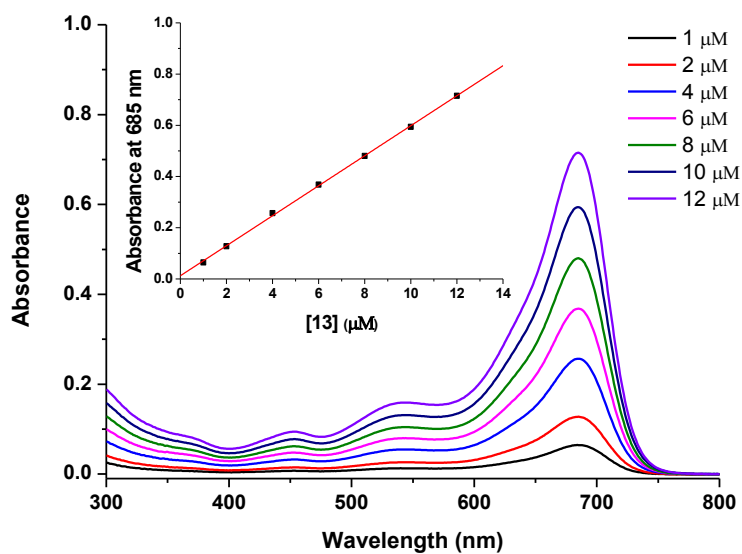

**Fig. S3** Electronic absorption spectra of **13** at various concentrations in PBS (pH = 7.4) with 0.1% (v/v) Tween 80. The inset plots the Q-band absorbance versus the concentration of **13**.

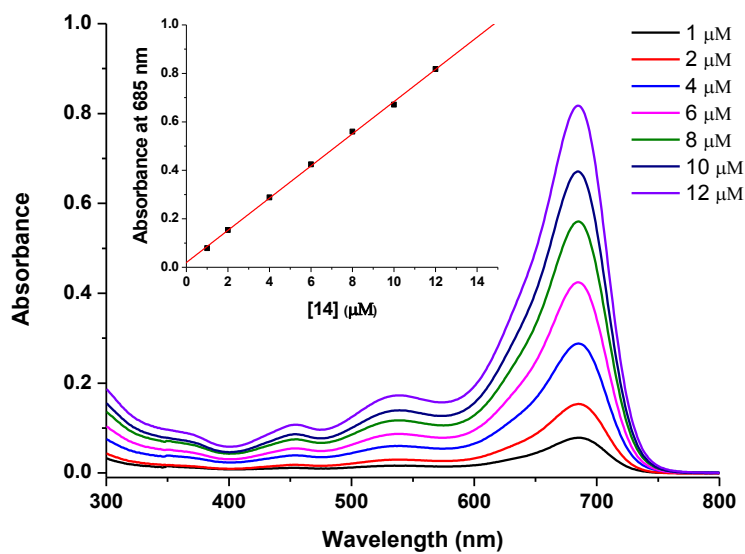

**Fig. S4** Electronic absorption spectra of **14** at various concentrations in PBS (pH = 7.4) with 0.1% (v/v) Tween 80. The inset plots the Q-band absorbance versus the concentration of **14**.

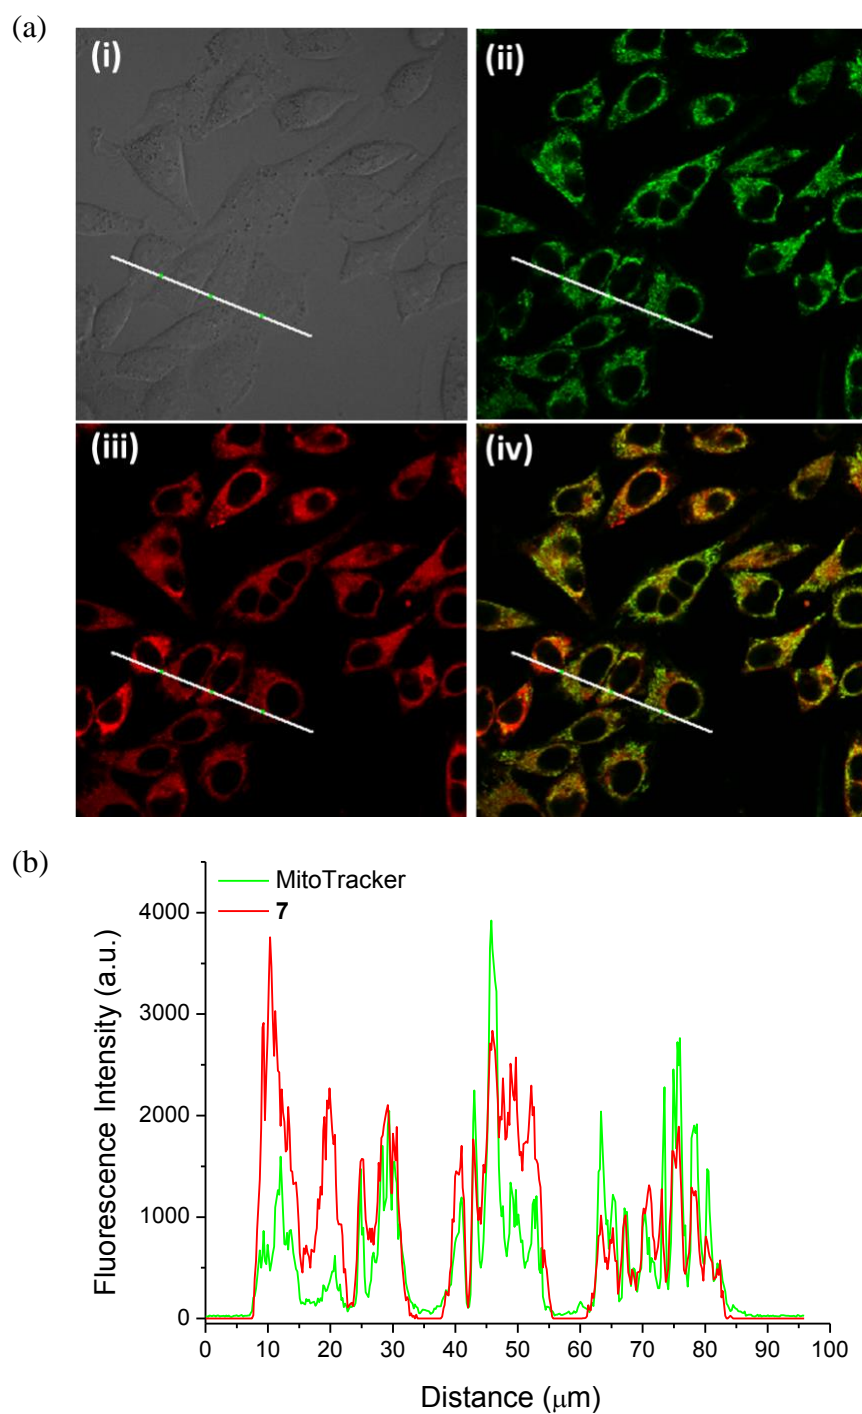

**Fig. S5** (a) Visualisation of the (i) bright-field image and intracellular fluorescence of HepG2 cells using filter sets specific for (ii) MitoTracker (1  $\mu\text{M}$ , in green) and (iii) **7** (2  $\mu\text{M}$ , in red), and (iv) the corresponding superimposed image. Figure (b) shows the fluorescence intensity line profiles of **7** (in red) and MitoTracker (in green) traced along the white lines in Figure (a).

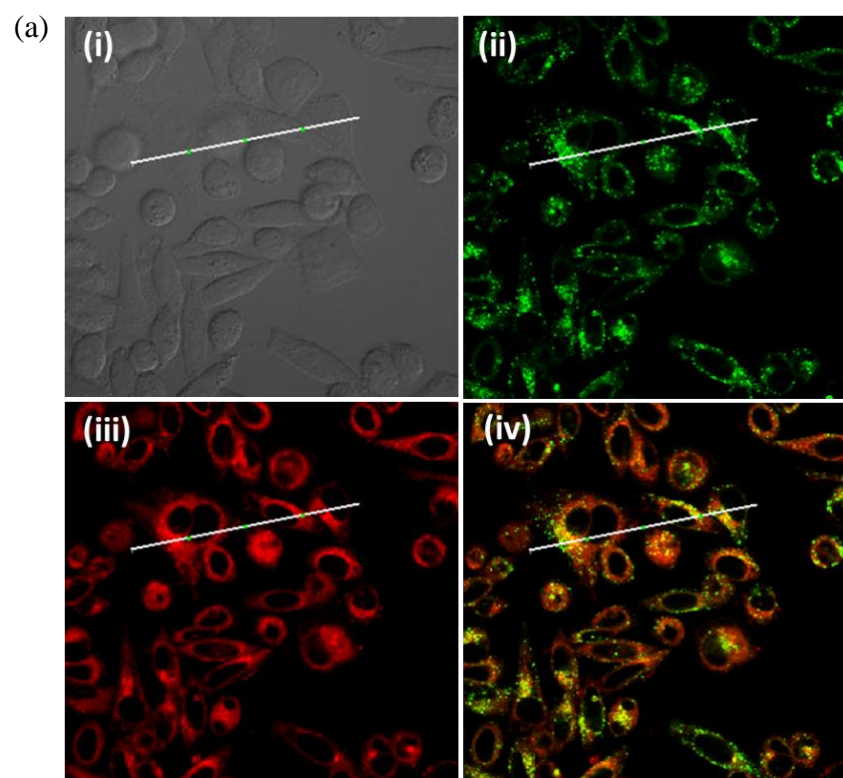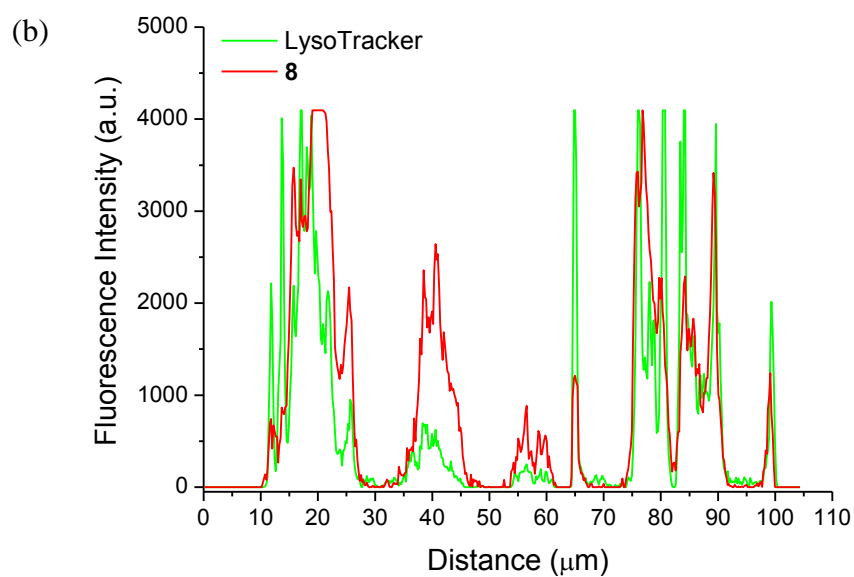

**Fig. S6** (a) Visualisation of the (i) bright-field image and intracellular fluorescence of HepG2 cells using filter sets specific for (ii) LysoTracker (2  $\mu\text{M}$ , in green) and (iii) **8** (2  $\mu\text{M}$ , in red), and (iv) the corresponding superimposed image. Figure (b) shows the fluorescence intensity line profiles of **8** (in red) and LysoTracker (in green) traced along the white lines in Figure (a).

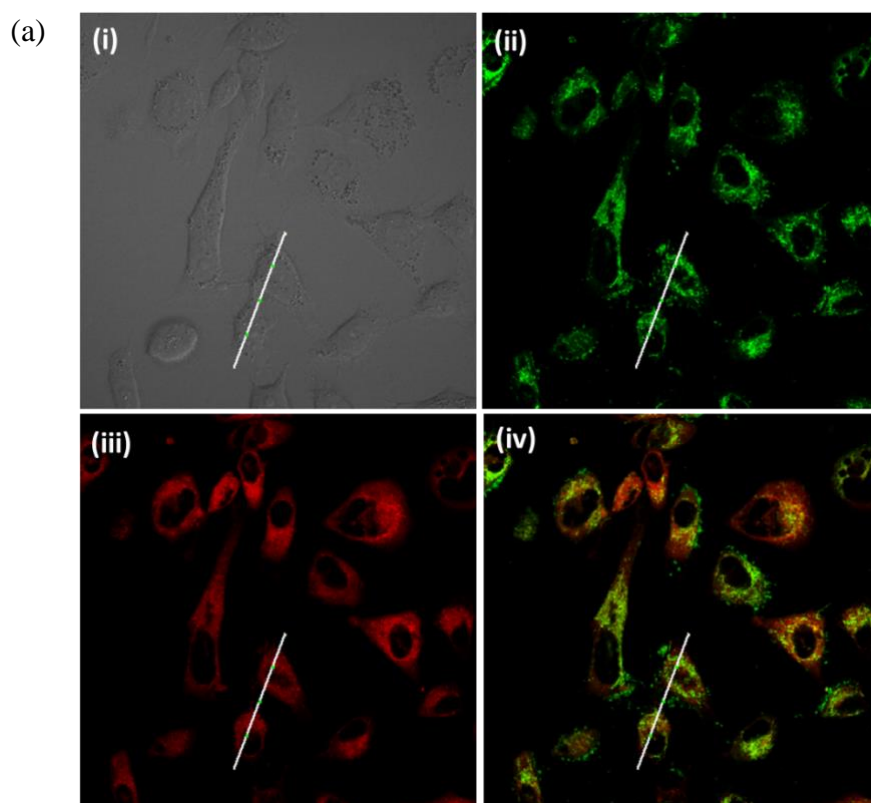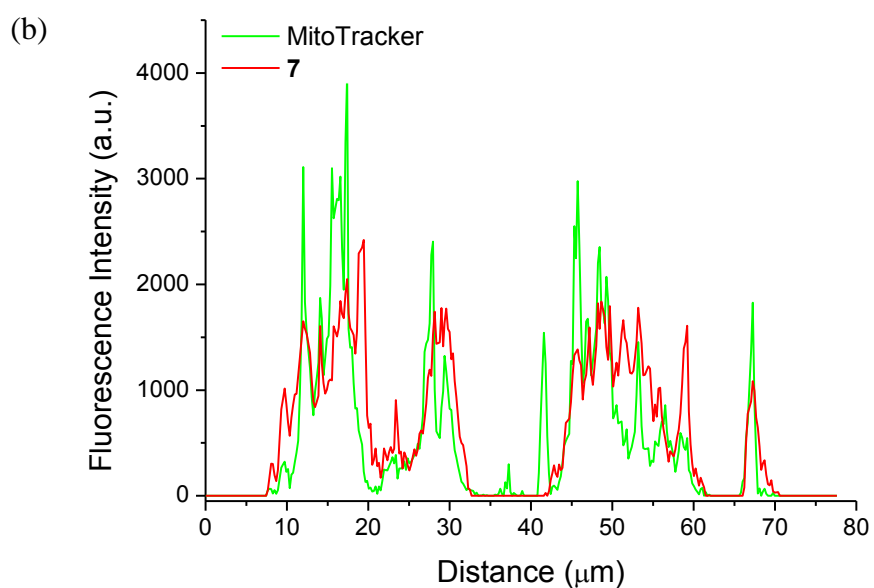

**Fig. S7** (a) Visualisation of the (i) bright-field image and intracellular fluorescence of MCF-7 cells using filter sets specific for (ii) MitoTracker (1  $\mu\text{M}$ , in green) and (iii) **7** (2  $\mu\text{M}$ , in red), and (iv) the corresponding superimposed image. Figure (b) shows the fluorescence intensity line profiles of **7** (in red) and MitoTracker (in green) traced along the white lines in Figure (a).

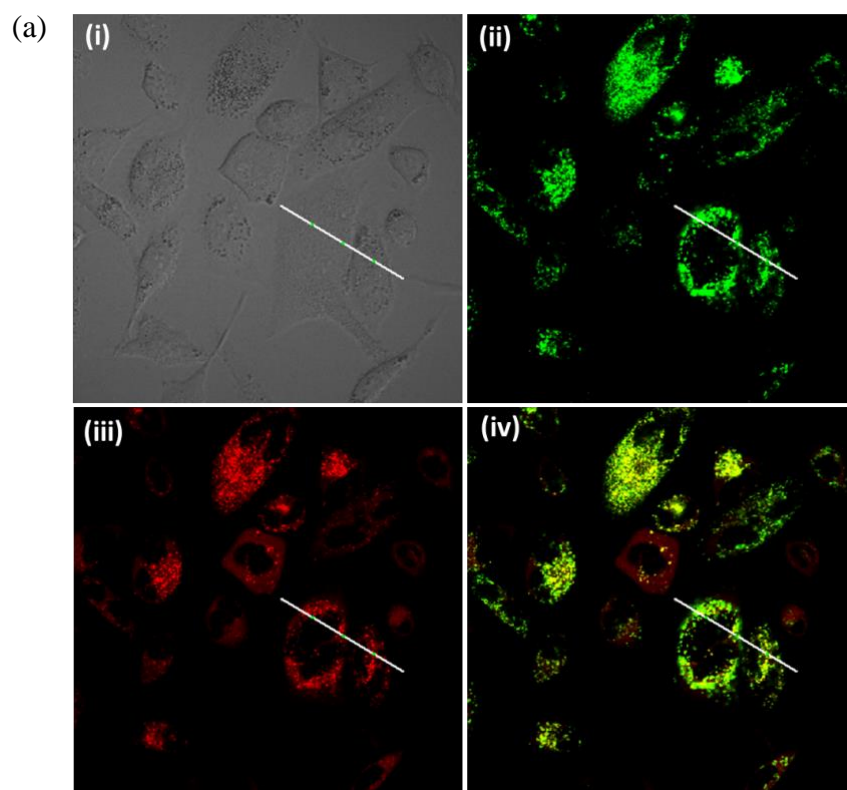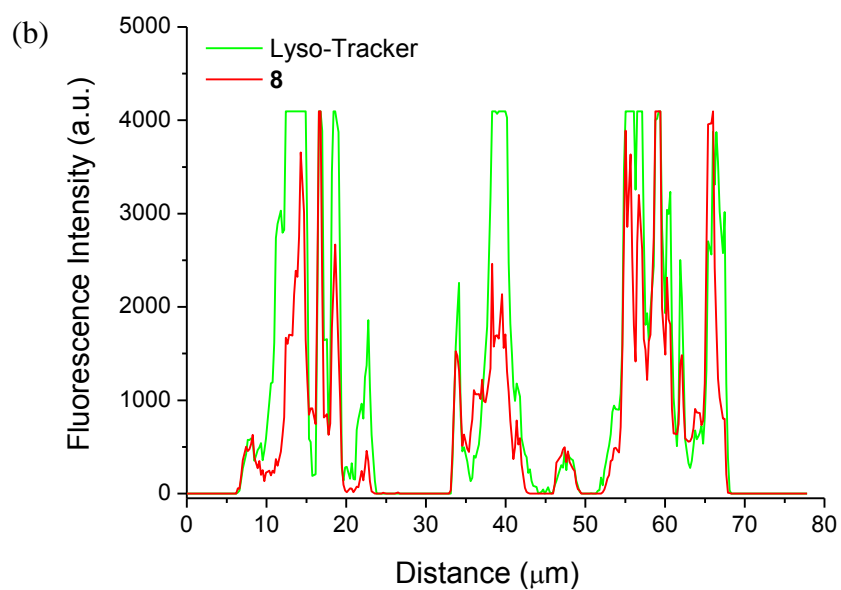

**Fig. S8** (a) Visualisation of the (i) bright-field image and intracellular fluorescence of MCF-7 cells using filter sets specific for (ii) LysoTracker (2  $\mu\text{M}$ , in green) and (iii) **8** (2  $\mu\text{M}$ , in red), and (iv) the corresponding superimposed image. Figure (b) shows the fluorescence intensity line profiles of **8** (in red) and LysoTracker (in green) traced along the white lines in Figure (a).



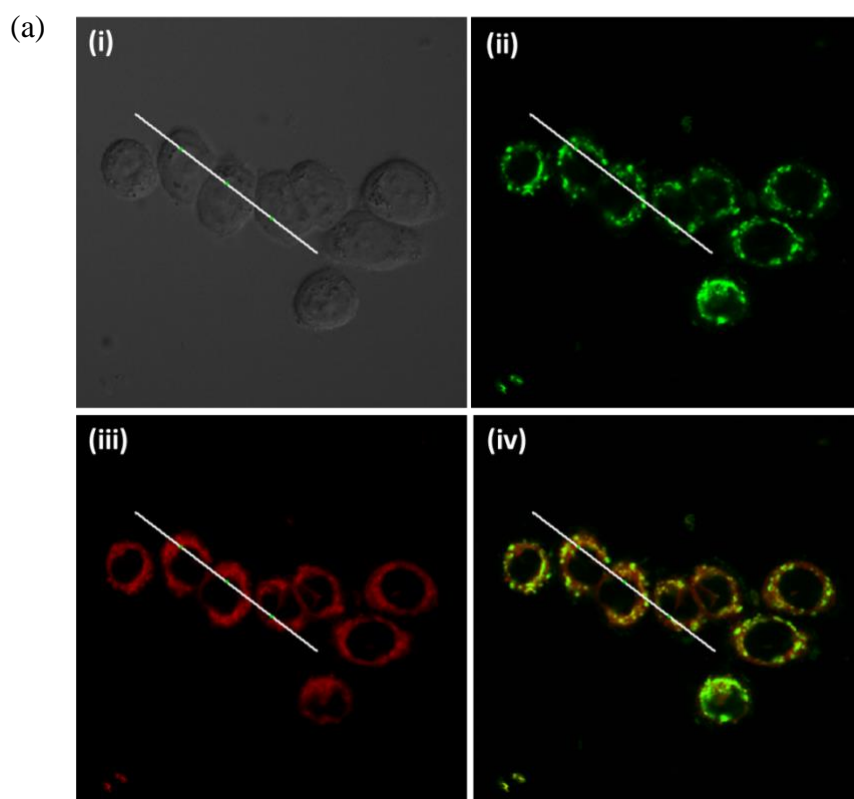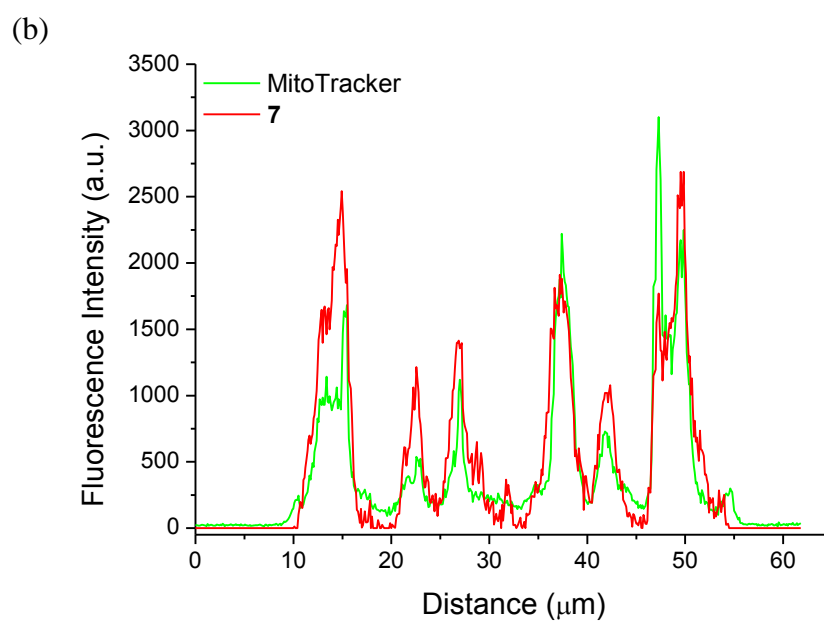

**Fig. S9** (a) Visualisation of the (i) bright-field image and intracellular fluorescence of HT29 cells using filter sets specific for (ii) MitoTracker (1  $\mu\text{M}$ , in green) and (iii) **7** (1  $\mu\text{M}$ , in red), and (iv) the corresponding superimposed image. Figure (b) shows the fluorescence intensity line profiles of **7** (in red) and MitoTracker (in green) traced along the white lines in Figure (a).

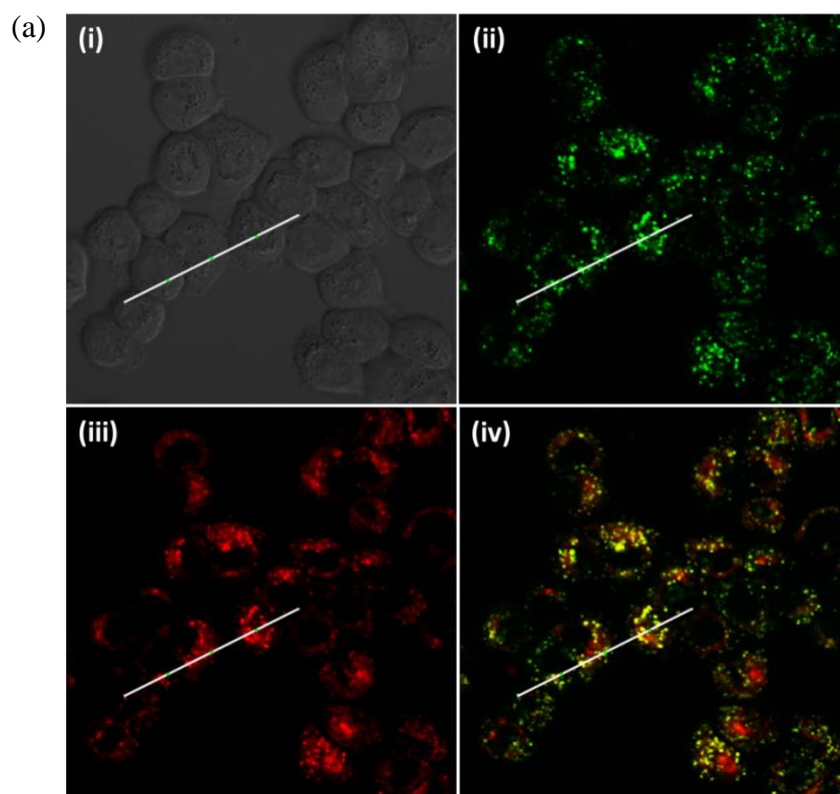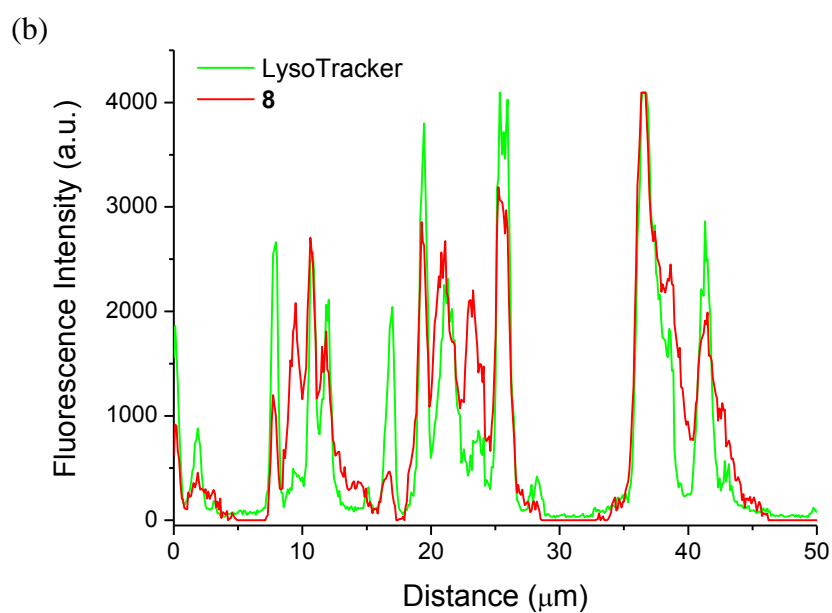

**Fig. S10** (a) Visualisation of the (i) bright-field image and intracellular fluorescence of HT29 cells using filter sets specific for (ii) LysoTracker (2  $\mu\text{M}$ , in green) and (iii) **8** (1  $\mu\text{M}$ , in red), and (iv) the corresponding superimposed image. Figure (b) shows the fluorescence intensity line profiles of **8** (in red) and LysoTracker (in green) traced along the white lines in Figure (a).

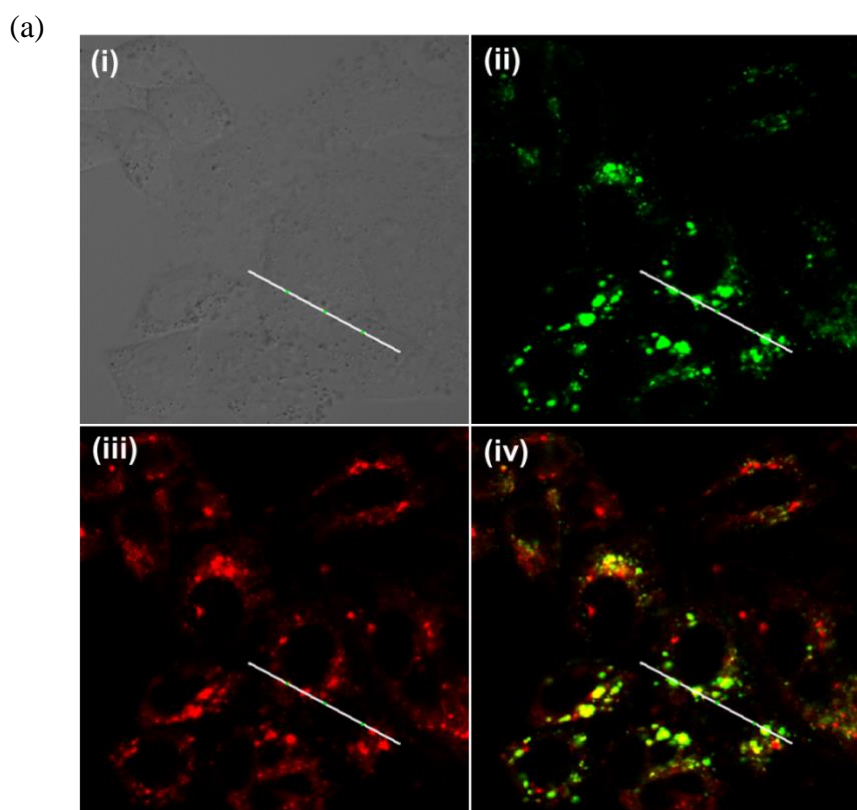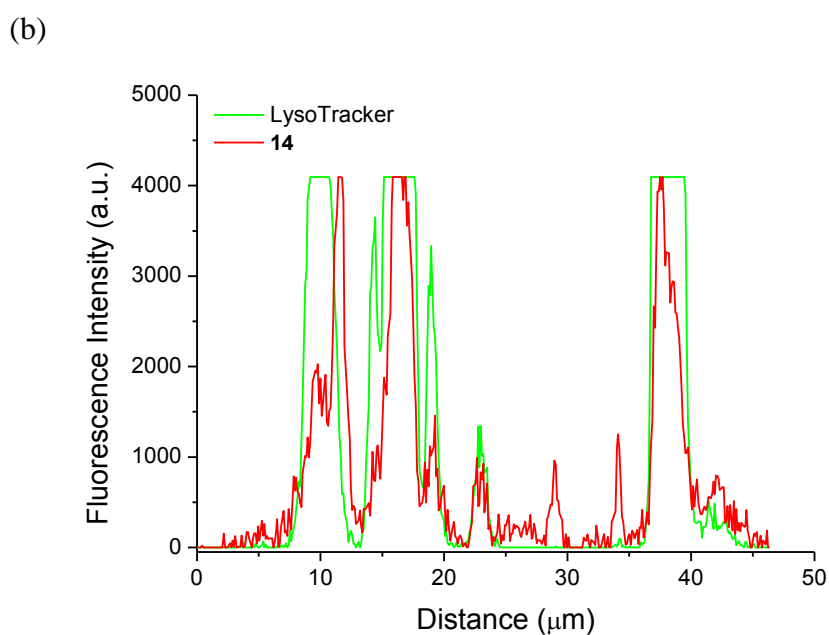

**Fig. S11** (a) Visualisation of the (i) bright-field image and intracellular fluorescence of HepG2 cells using filter sets specific for (ii) LysoTracker (2  $\mu\text{M}$ , in green) and (iii) **14** (4  $\mu\text{M}$ , in red), and (iv) the corresponding superimposed image. Figure (b) shows the fluorescence intensity line profiles of **14** (in red) and LysoTracker (in green) traced along the white lines in Figure (a).

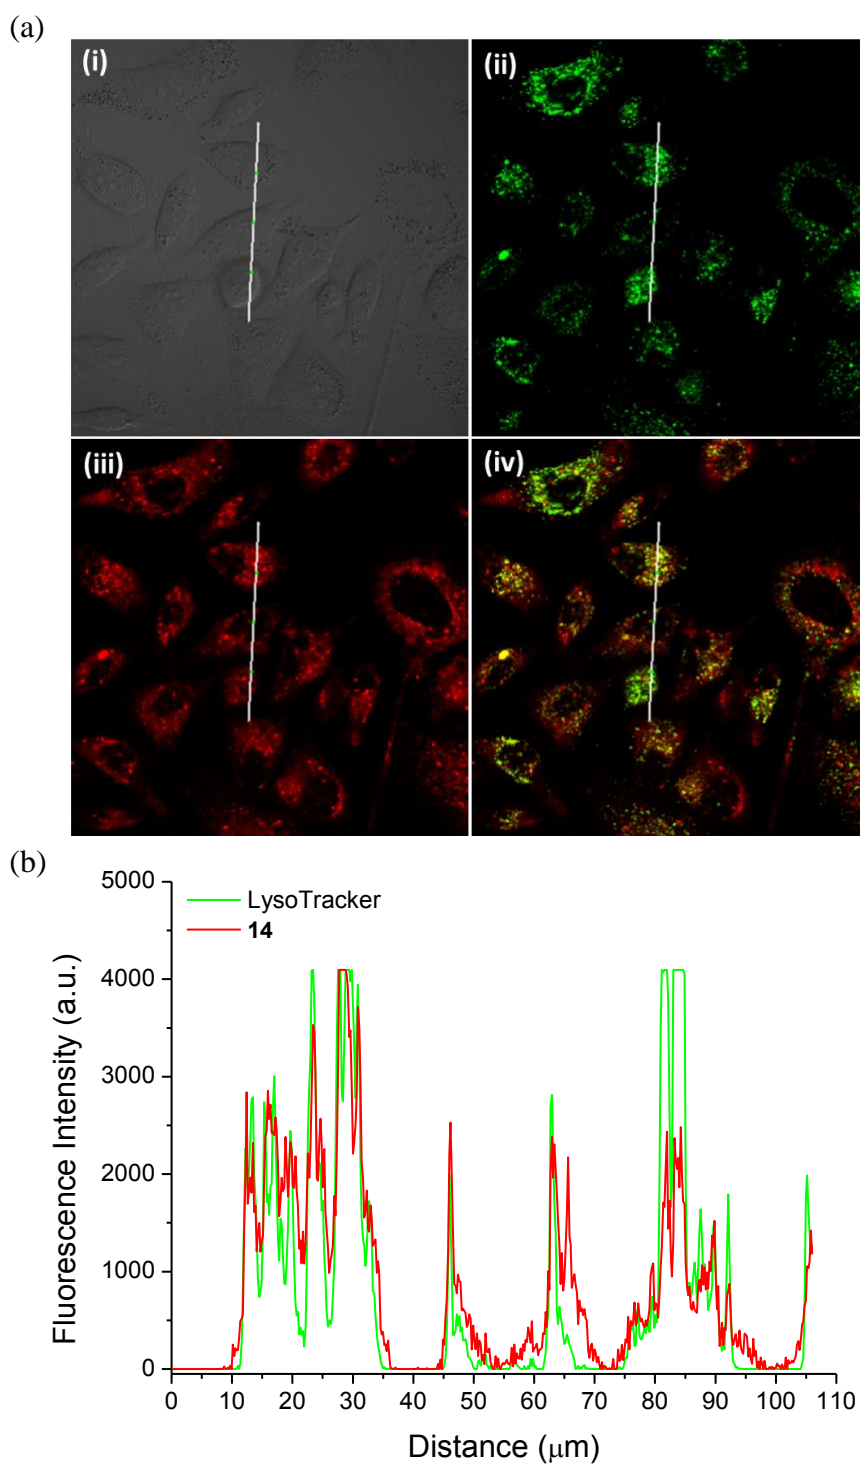

**Fig. S12** (a) Visualisation of the (i) bright-field image and intracellular fluorescence of MCF-7 cells using filter sets specific for (ii) LysoTracker ( $2 \mu\text{M}$ , in green) and (iii) **14** ( $4 \mu\text{M}$ , in red), and (iv) the corresponding superimposed image. Figure (b) shows the fluorescence intensity line profiles of **14** (in red) and LysoTracker (in green) traced along the white lines in Figure (a).

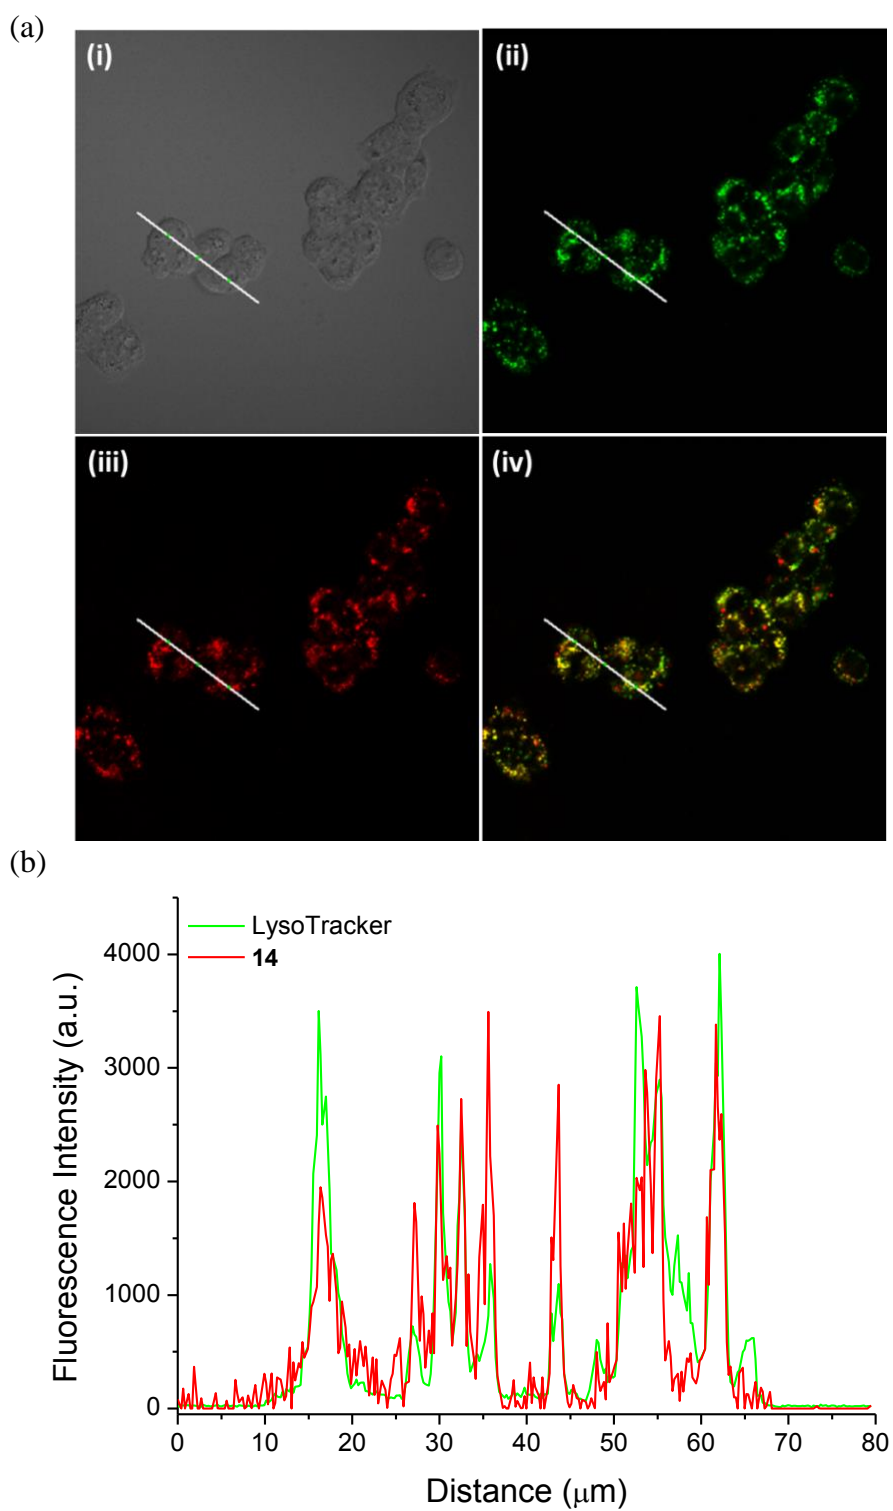

**Fig. S13** (a) Visualisation of the (i) bright-field image and intracellular fluorescence of HT29 cells using filter sets specific for (ii) LysoTracker (0.2  $\mu\text{M}$ , in green) and (iii) **14** (4  $\mu\text{M}$ , in red), and (iv) the corresponding superimposed image. Figure (b) shows the fluorescence intensity line profiles of **14** (in red) and LysoTracker (in green) traced along the white lines in Figure (a).

$^1\text{H}$  and  $^{13}\text{C}\{^1\text{H}\}$  NMR spectra of **2** in  $\text{CDCl}_3$

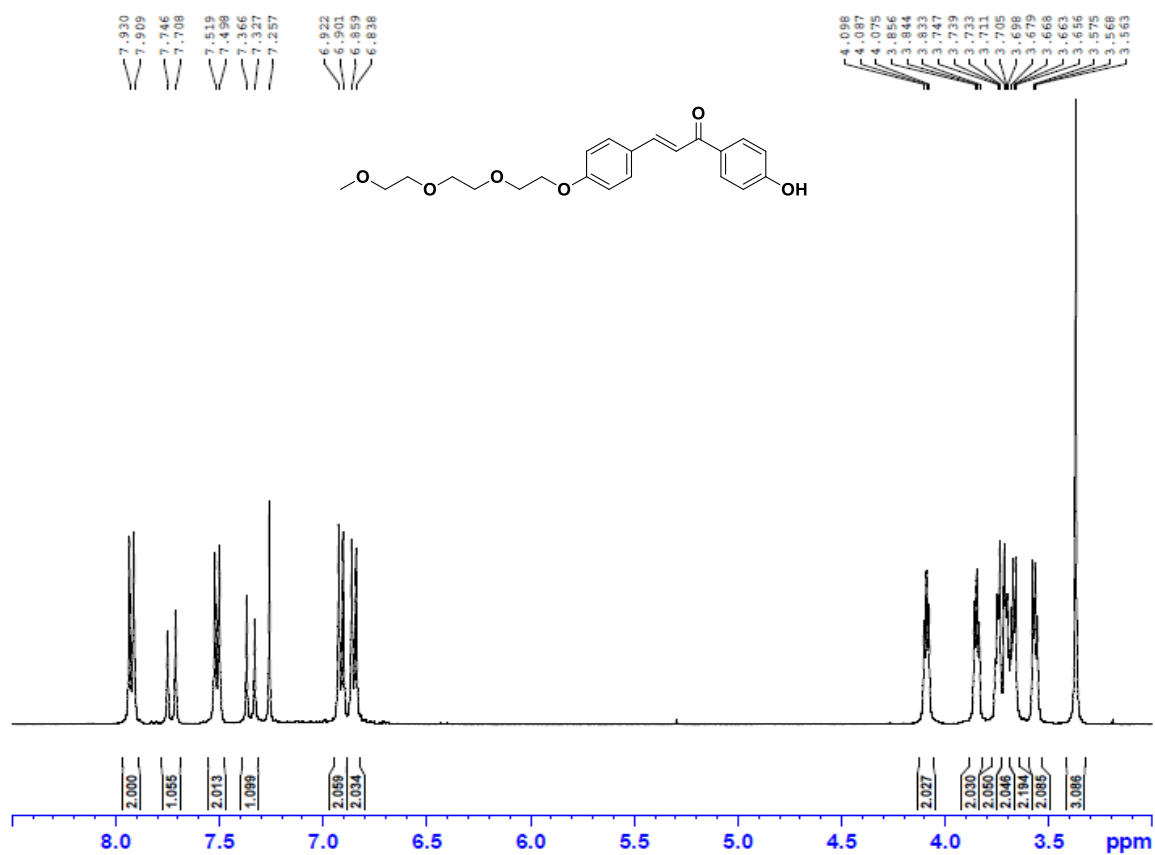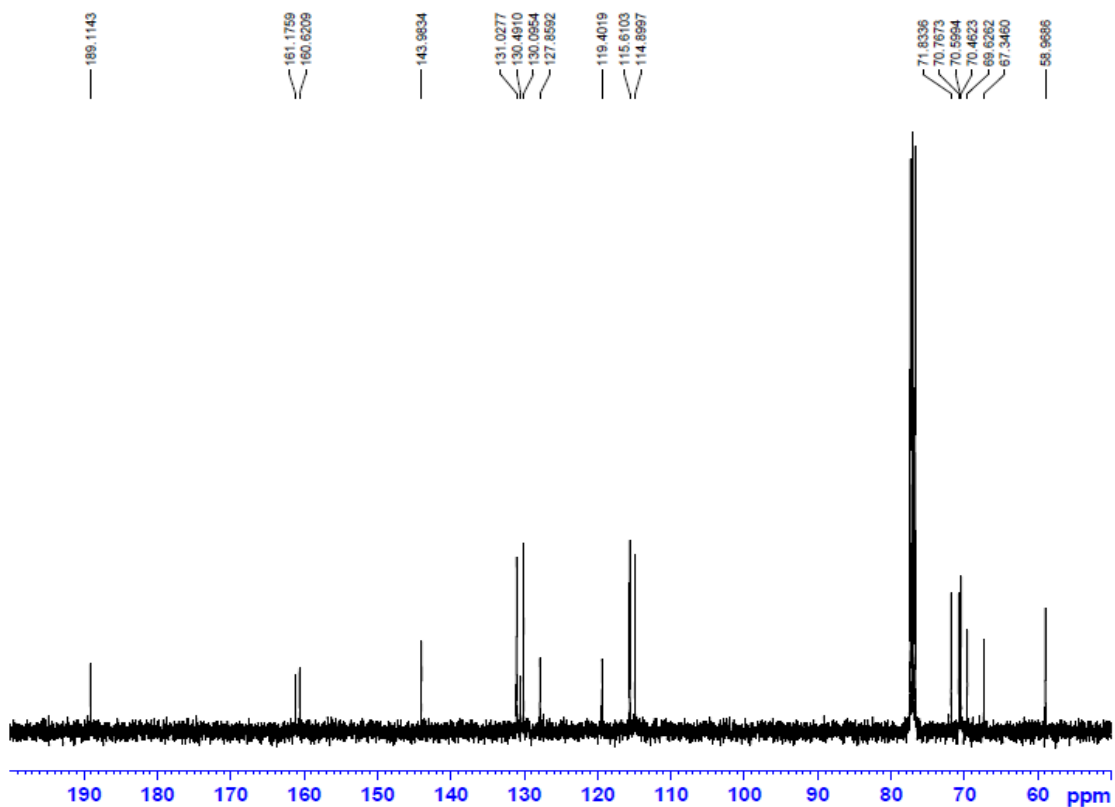

$^1\text{H}$  and  $^{13}\text{C}\{^1\text{H}\}$  NMR spectra of **3** in  $\text{CDCl}_3$

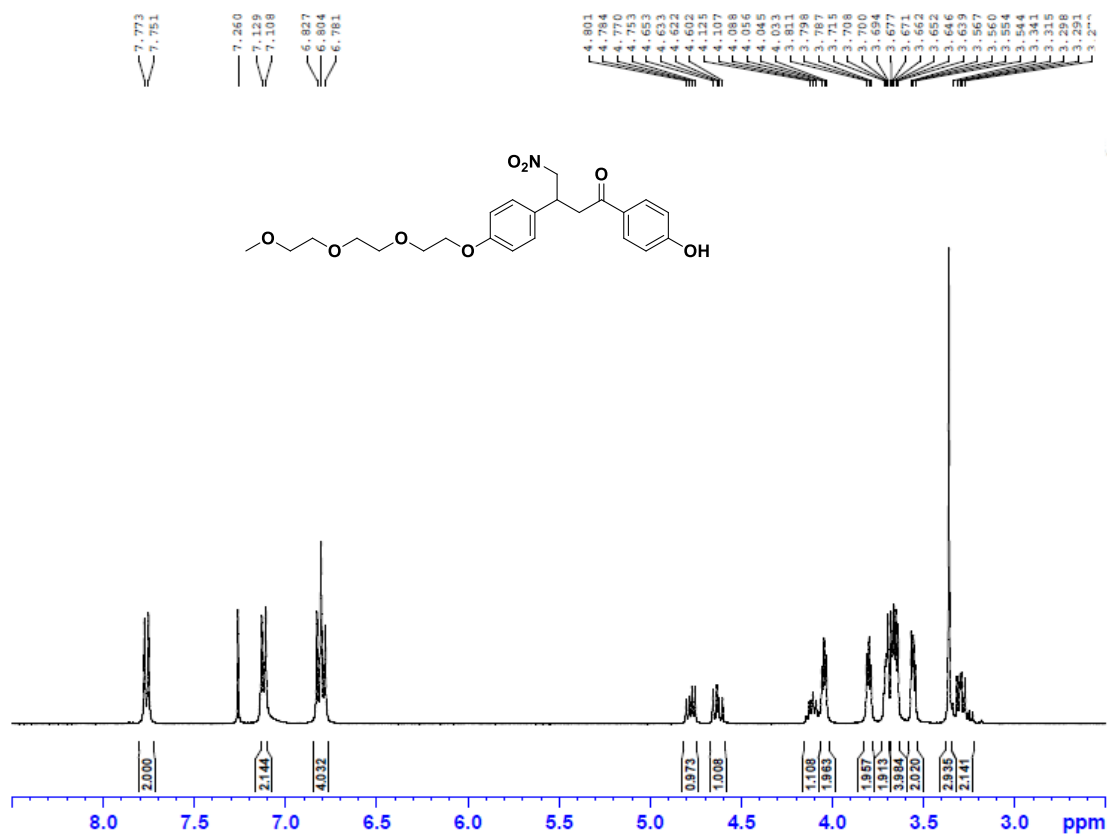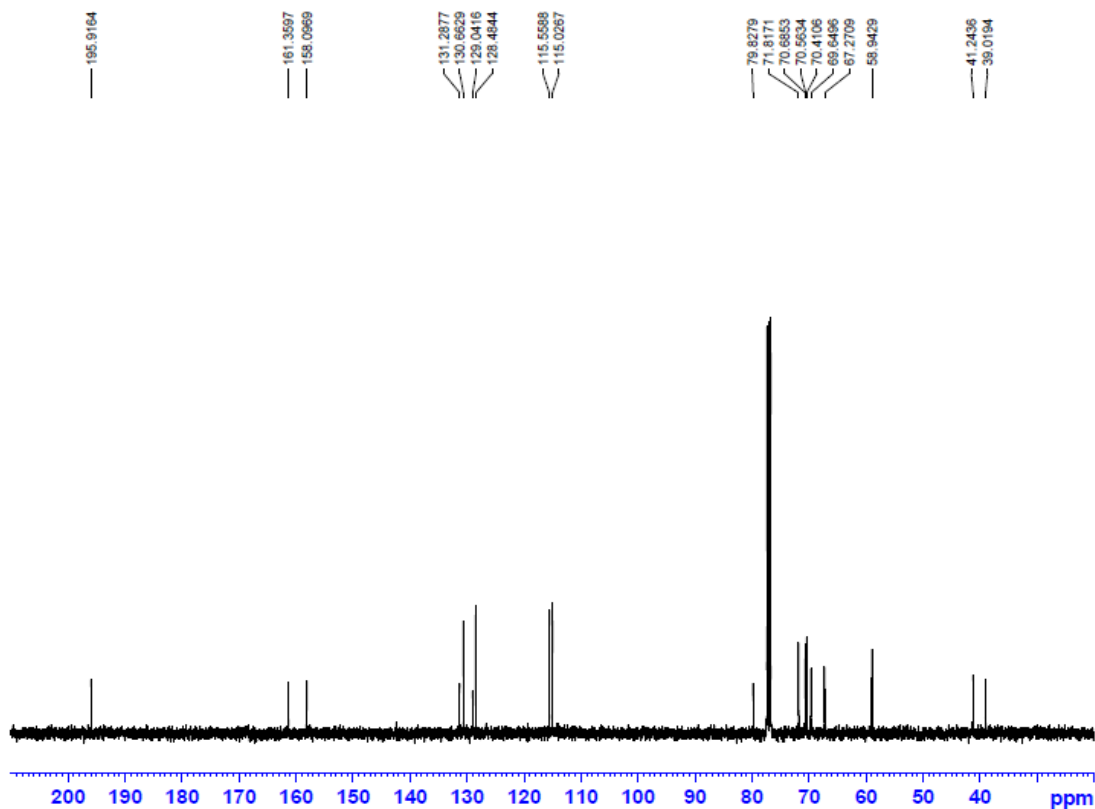

$^1\text{H}$  (in  $\text{CDCl}_3$ ) and  $^{13}\text{C}\{^1\text{H}\}$  (in  $\text{DMSO-d}_6$ ) NMR spectra of **4**

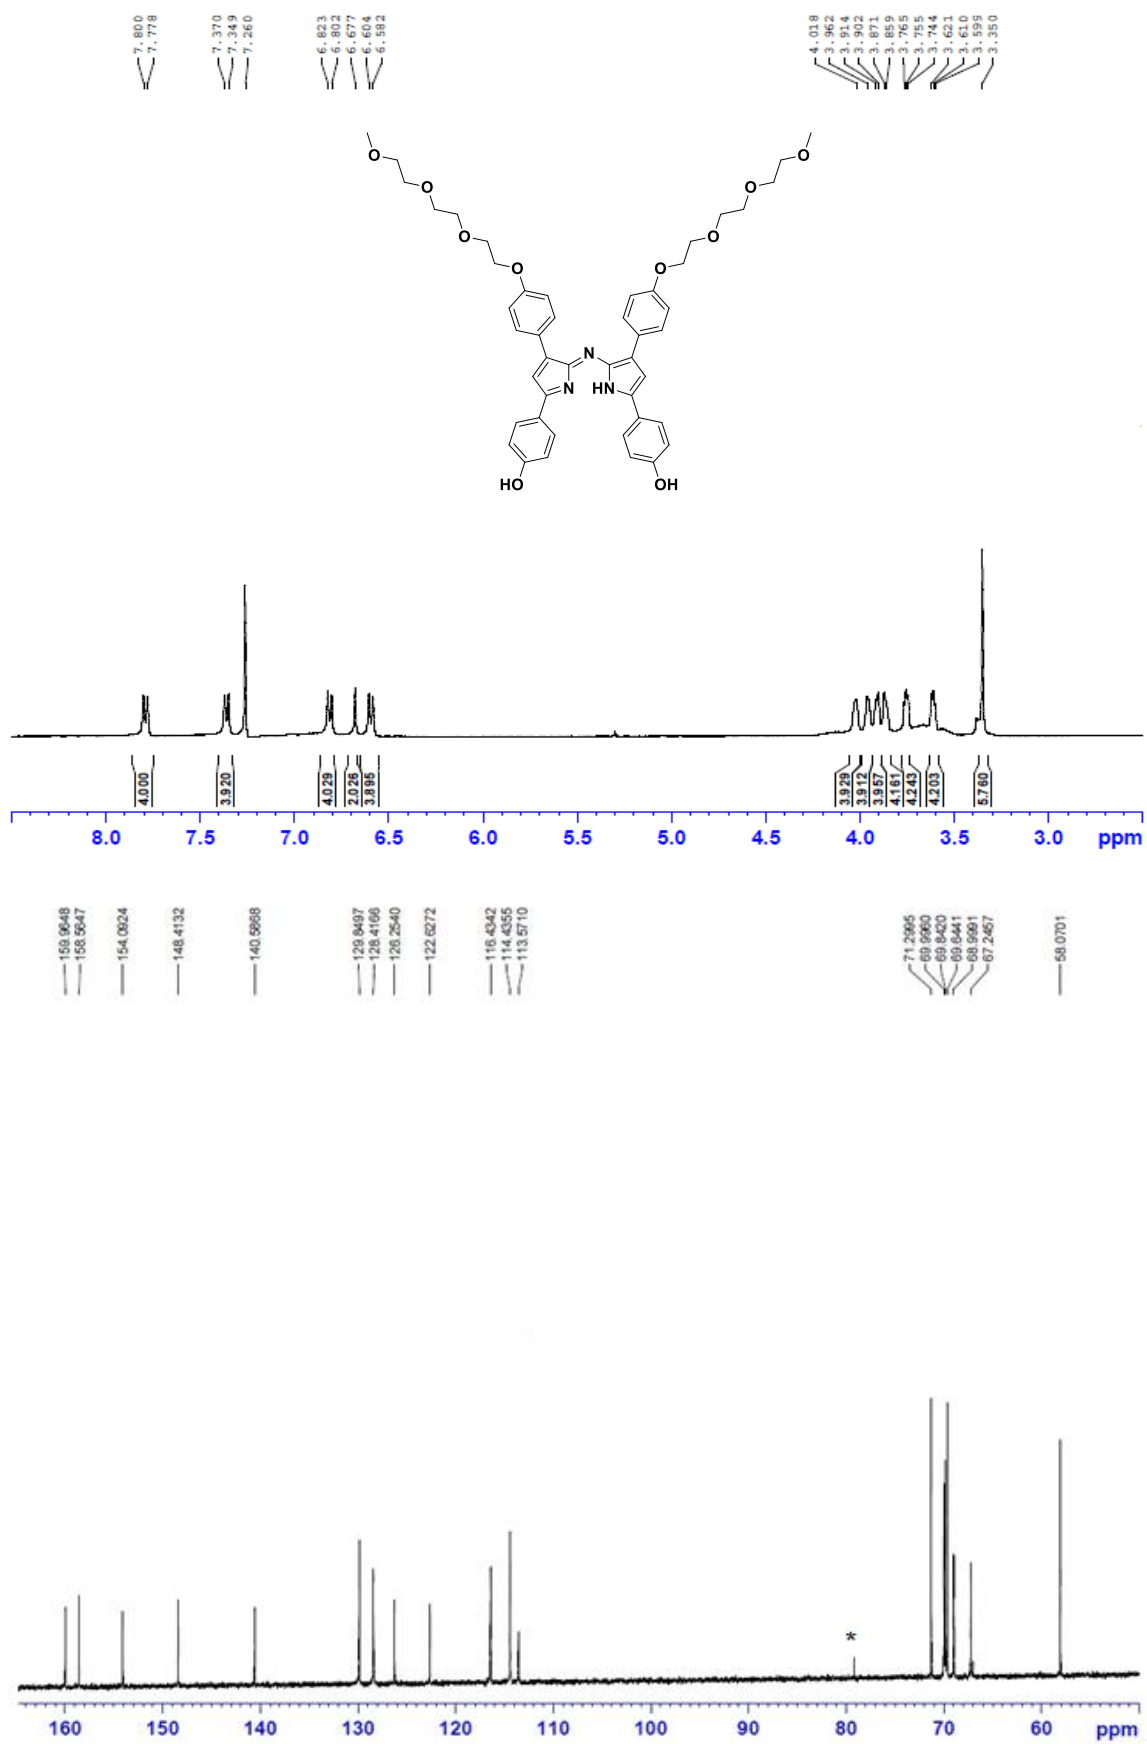



$^1\text{H}$  (in  $\text{CDCl}_3$ ) and  $^{13}\text{C}\{^1\text{H}\}$  (in  $\text{DMSO-d}_6$ ) NMR spectra of **5**

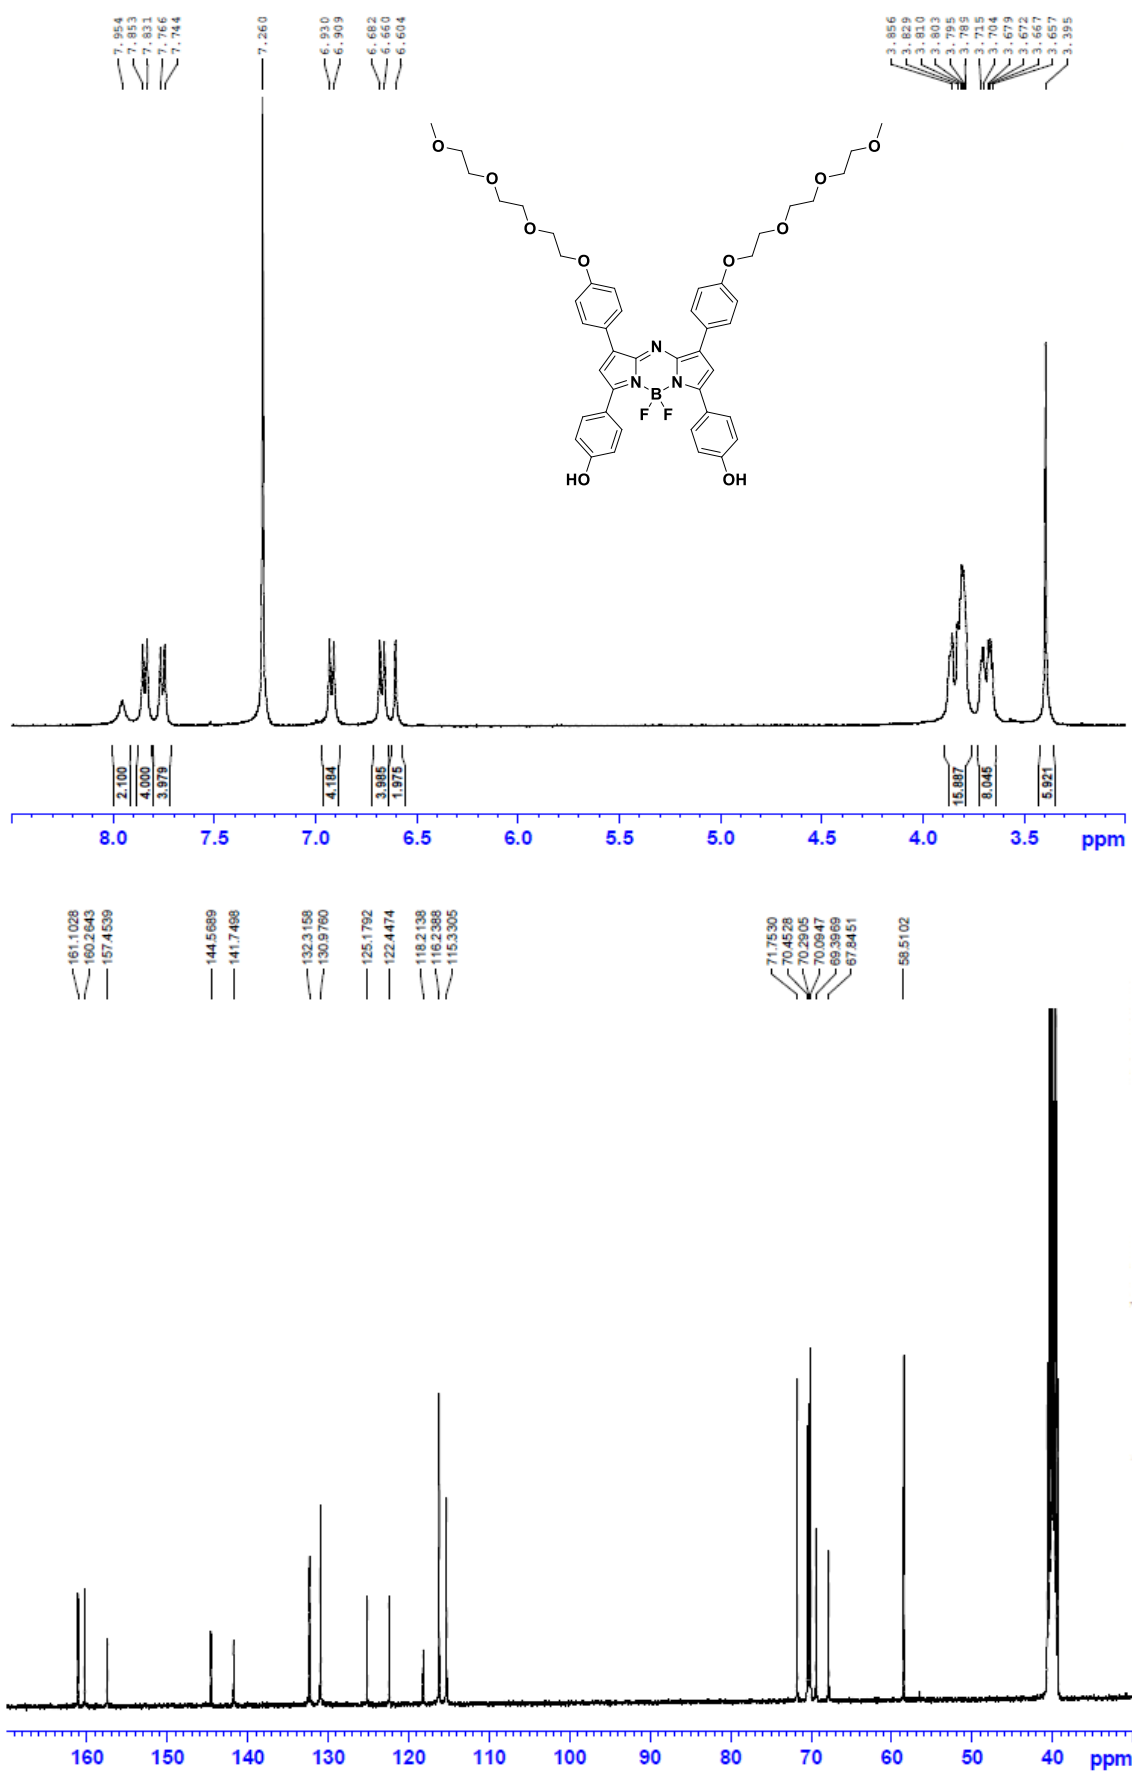

$^1\text{H}$  and  $^{13}\text{C}\{^1\text{H}\}$  NMR spectra of **6** in  $\text{CDCl}_3$

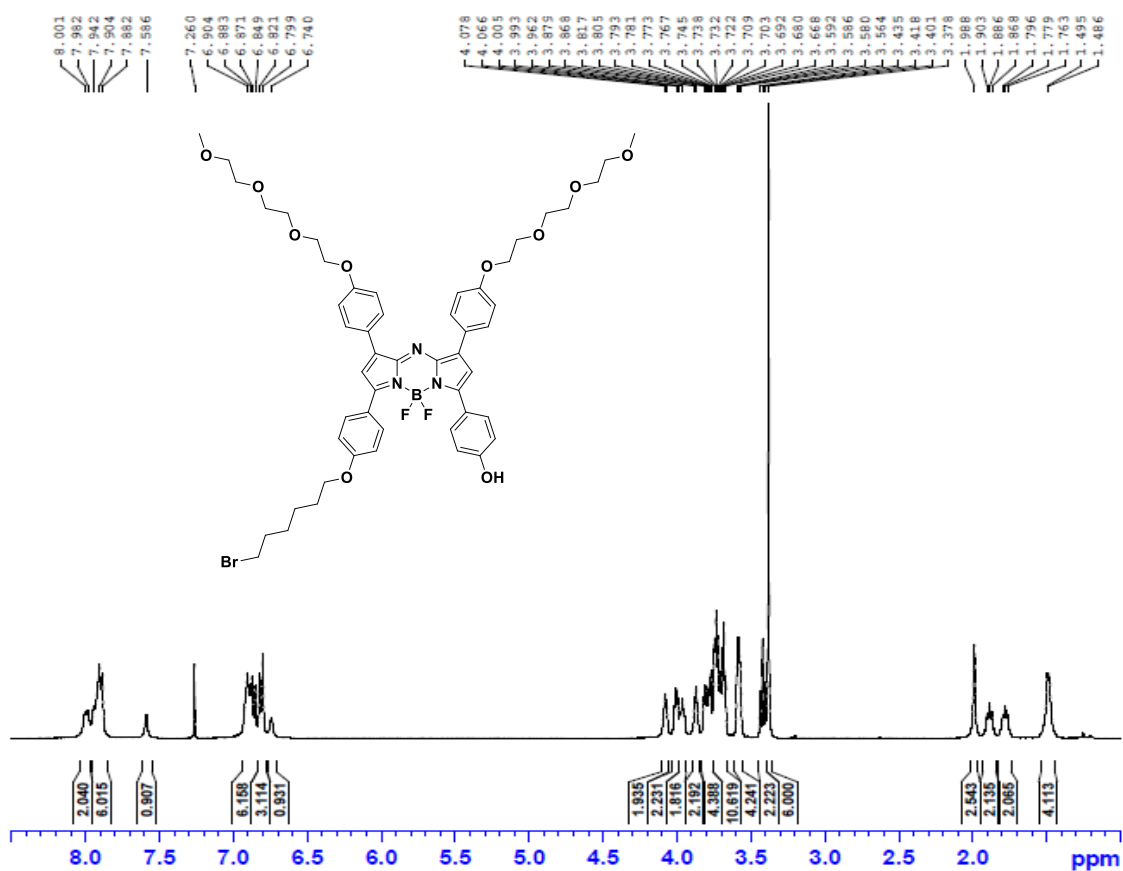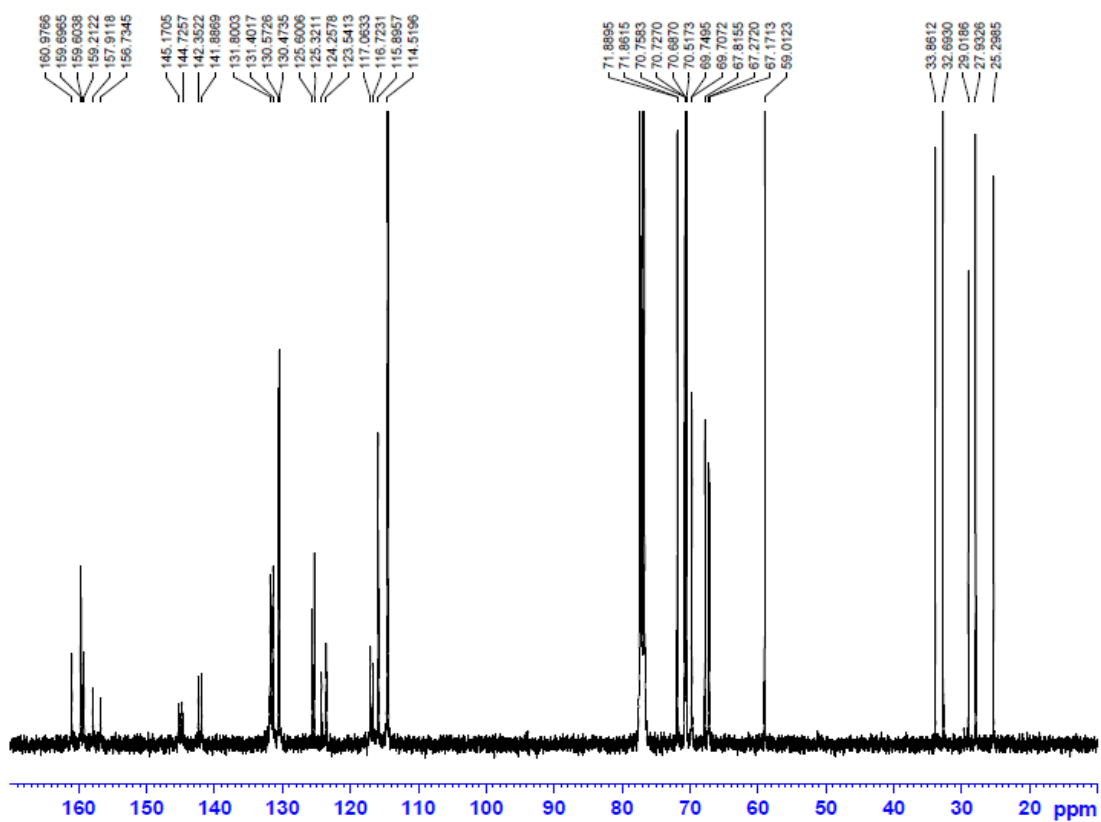

$^1\text{H}$  (in  $\text{CD}_3\text{COCD}_3$ ) and  $^{13}\text{C}\{^1\text{H}\}$  (in  $\text{CDCl}_3$ ) NMR spectra of **7**

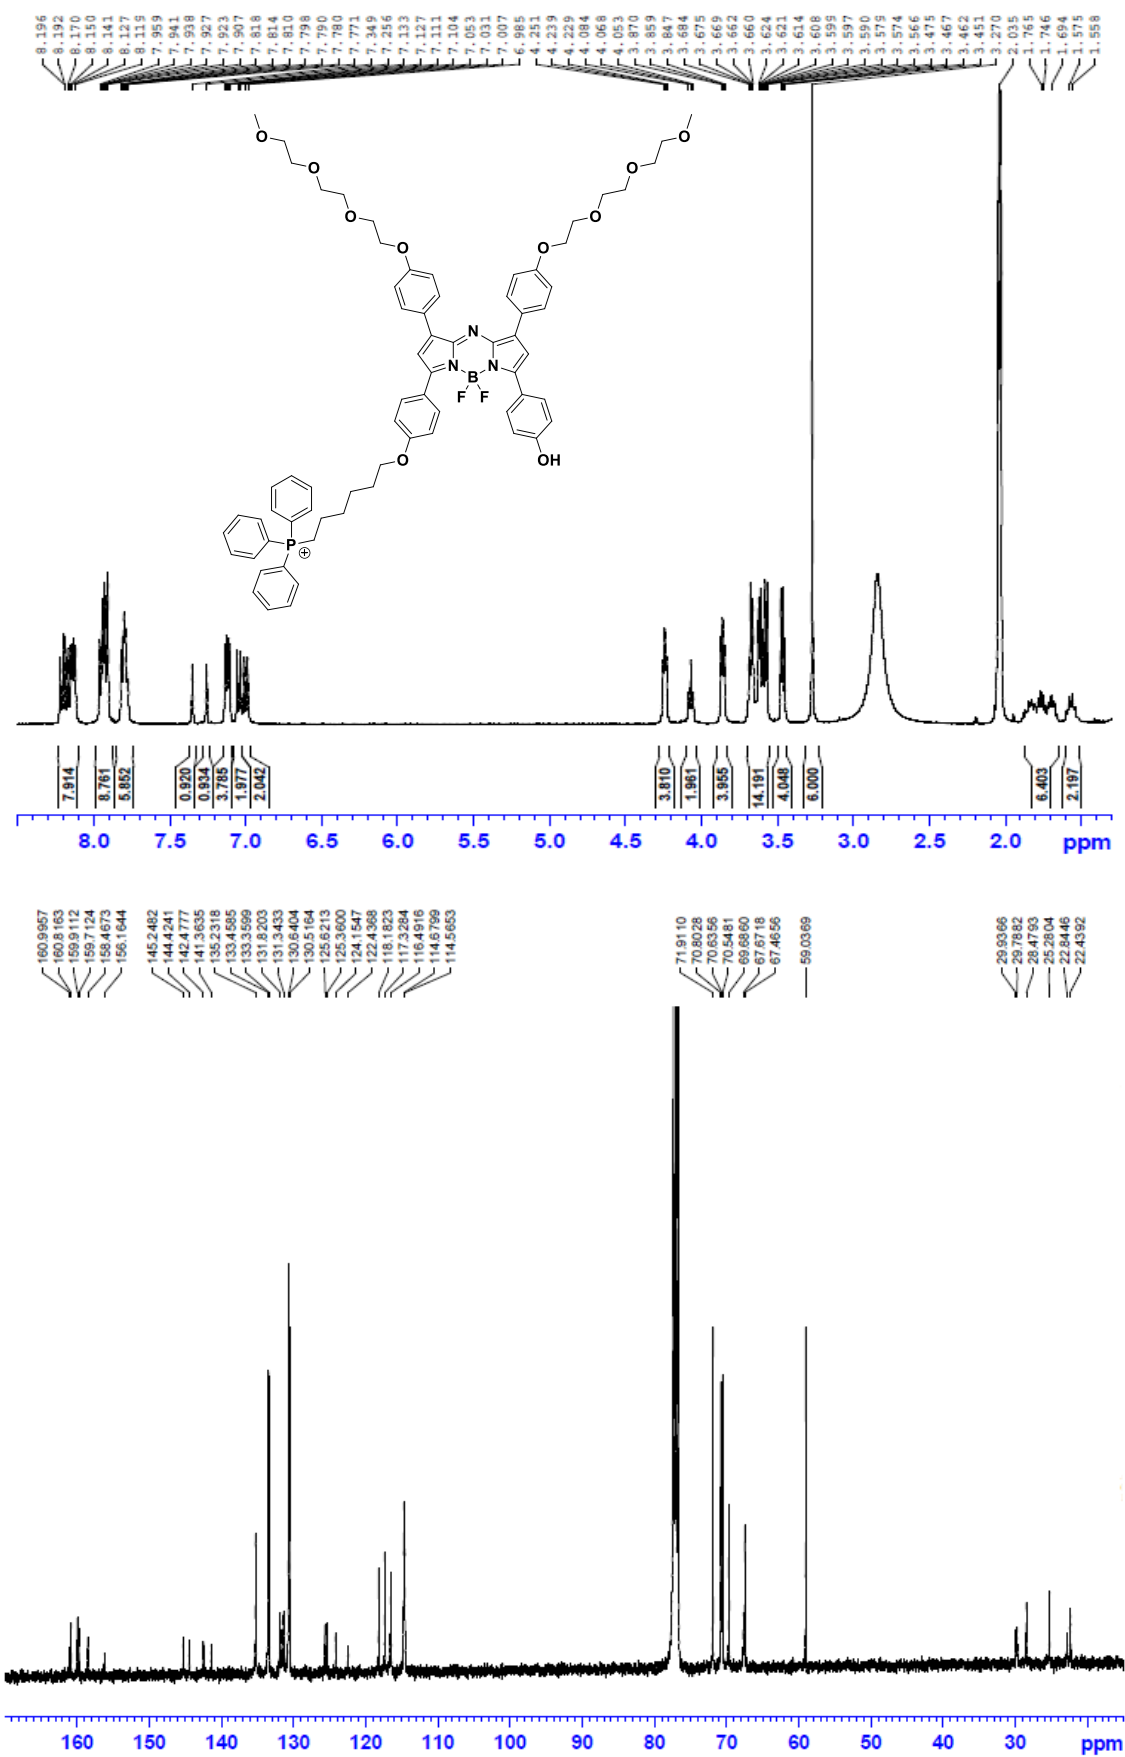

$^1\text{H}$  and  $^{13}\text{C}\{^1\text{H}\}$  NMR spectra of **8** in  $\text{CDCl}_3$

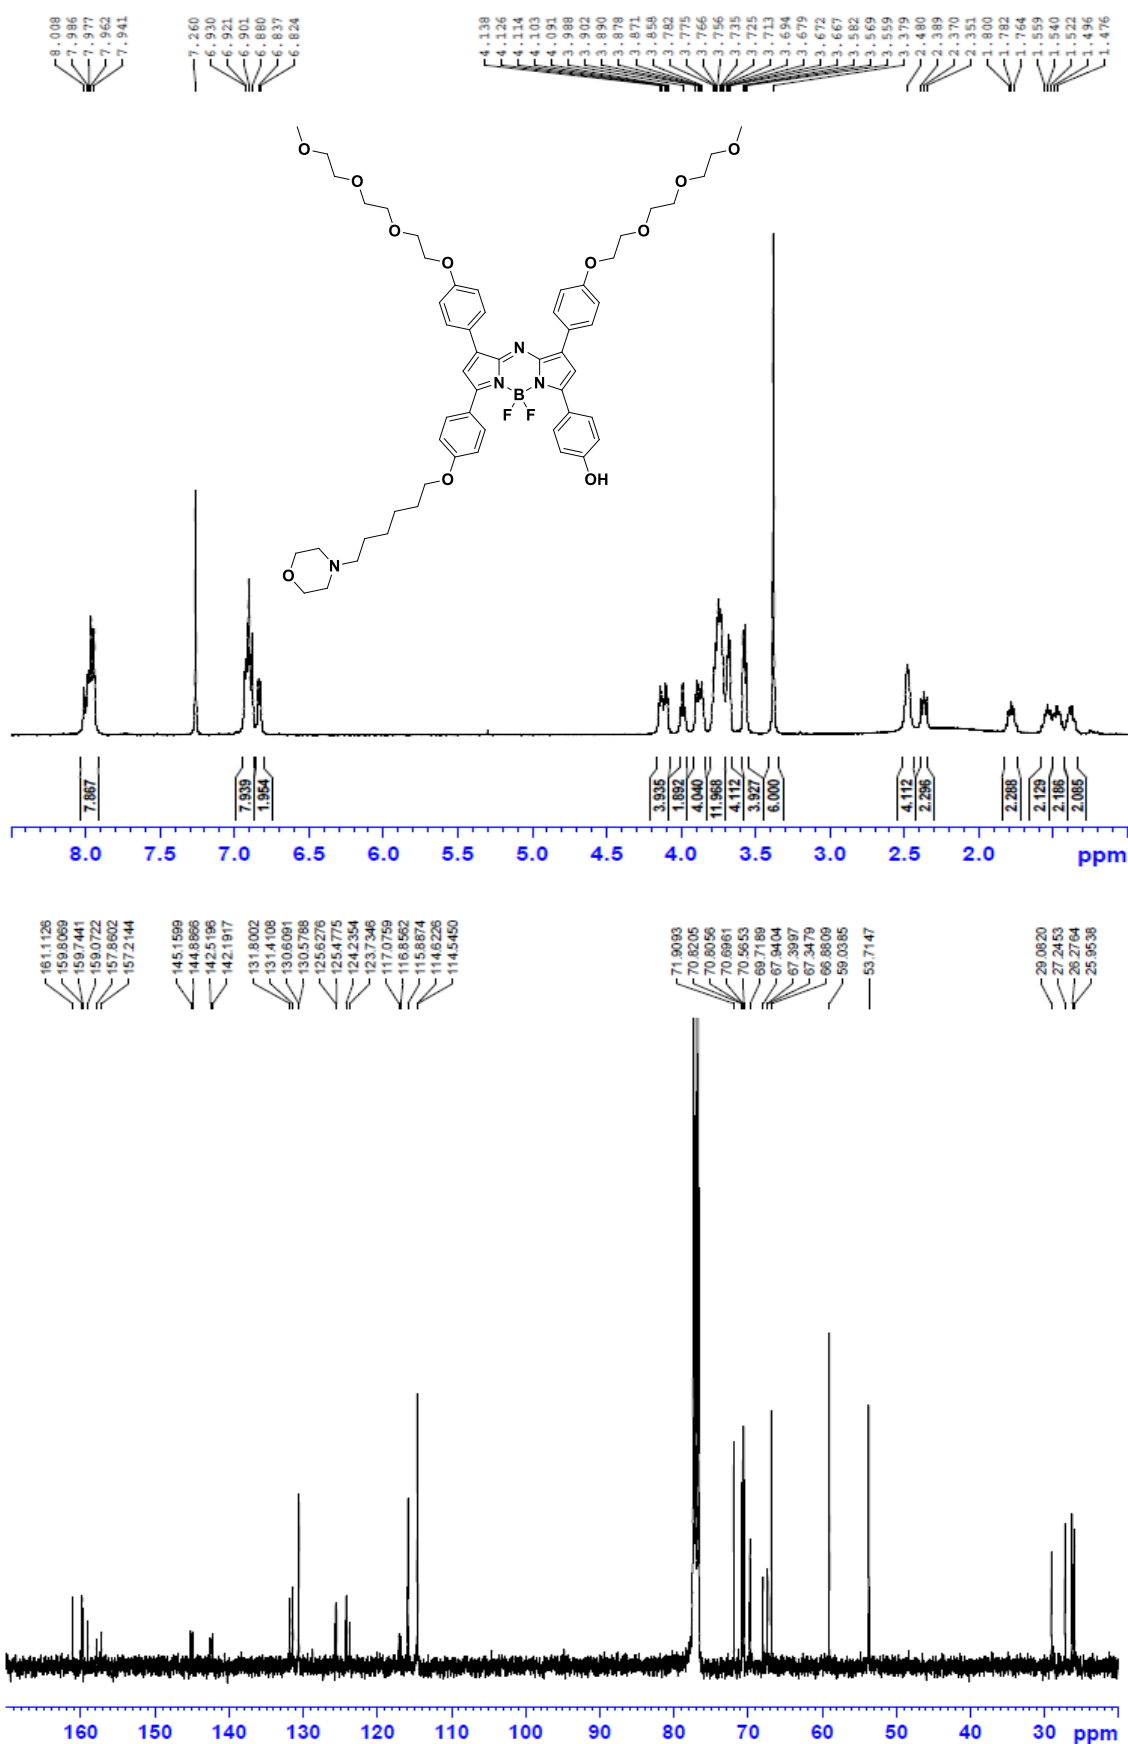

$^1\text{H}$  and  $^{13}\text{C}\{^1\text{H}\}$  NMR spectra of **9** in  $\text{CDCl}_3$

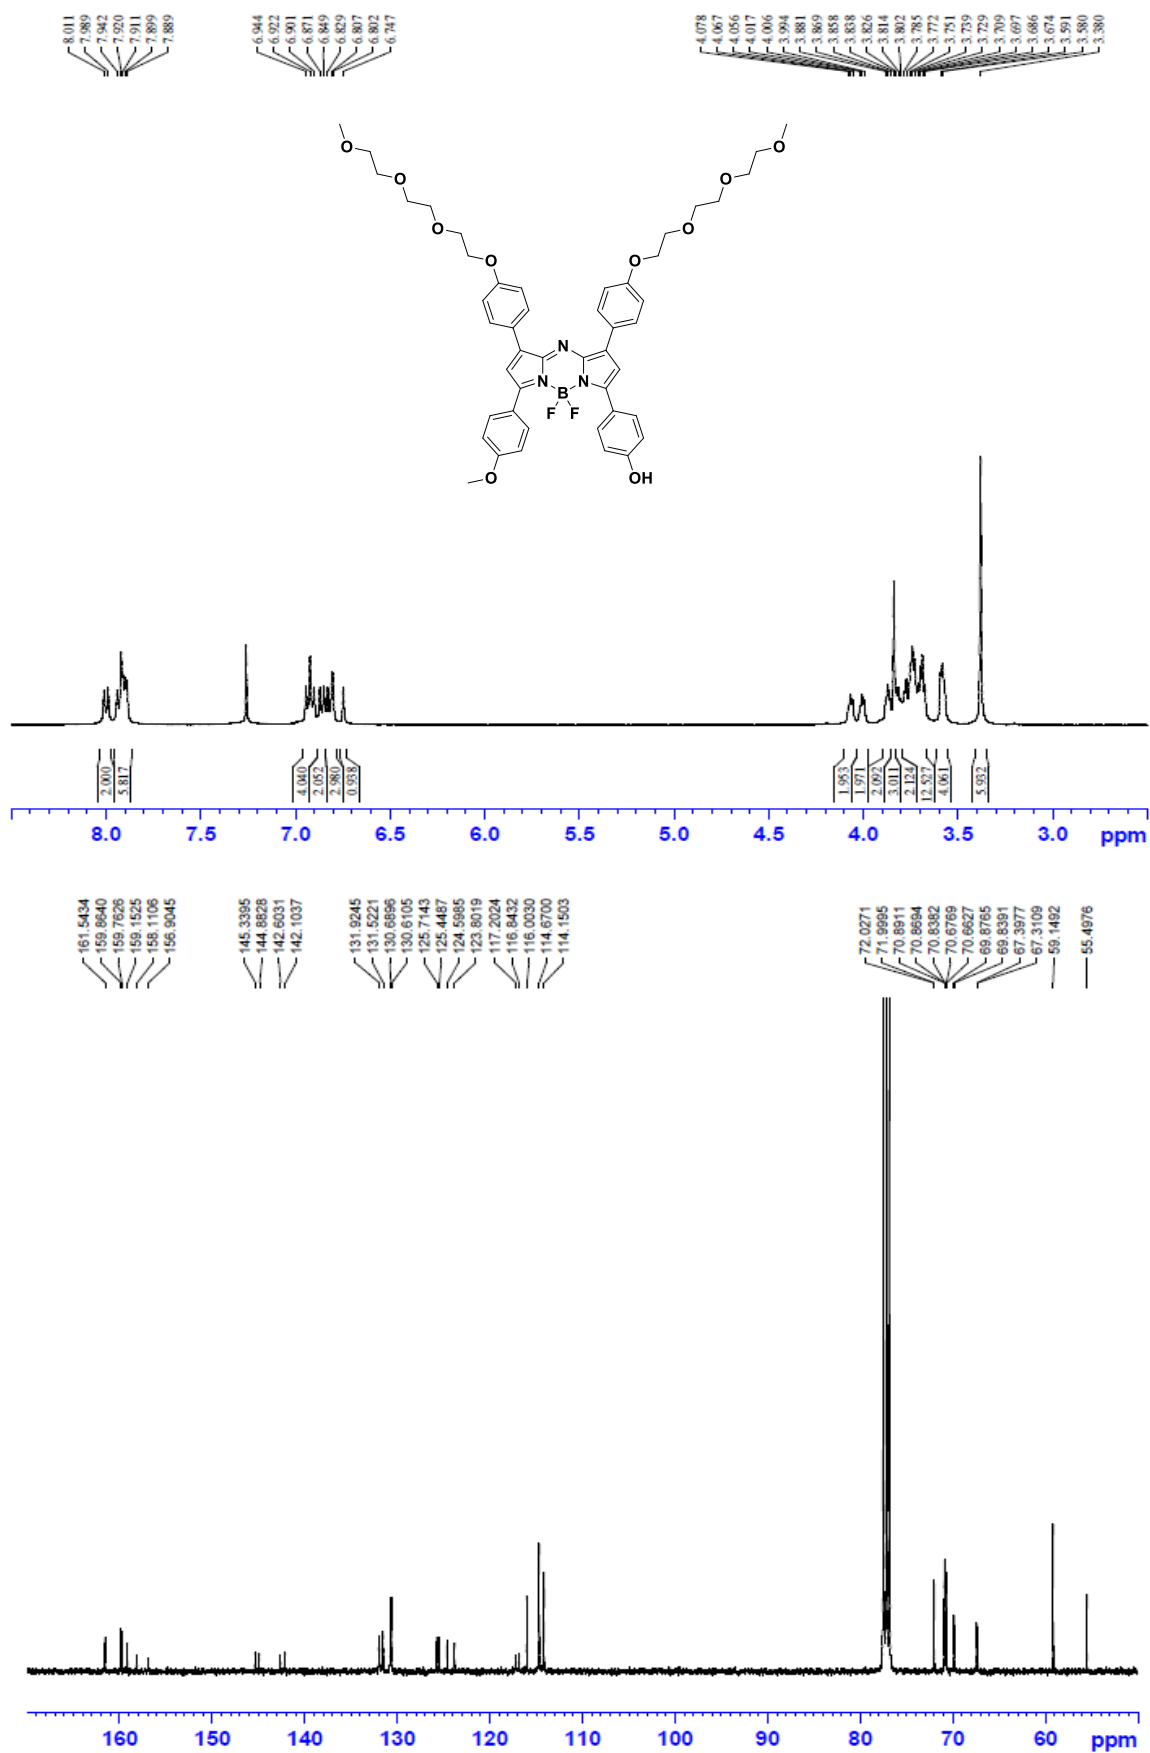

$^1\text{H}$  and  $^{13}\text{C}\{^1\text{H}\}$  NMR spectra of **10** in  $\text{CDCl}_3$

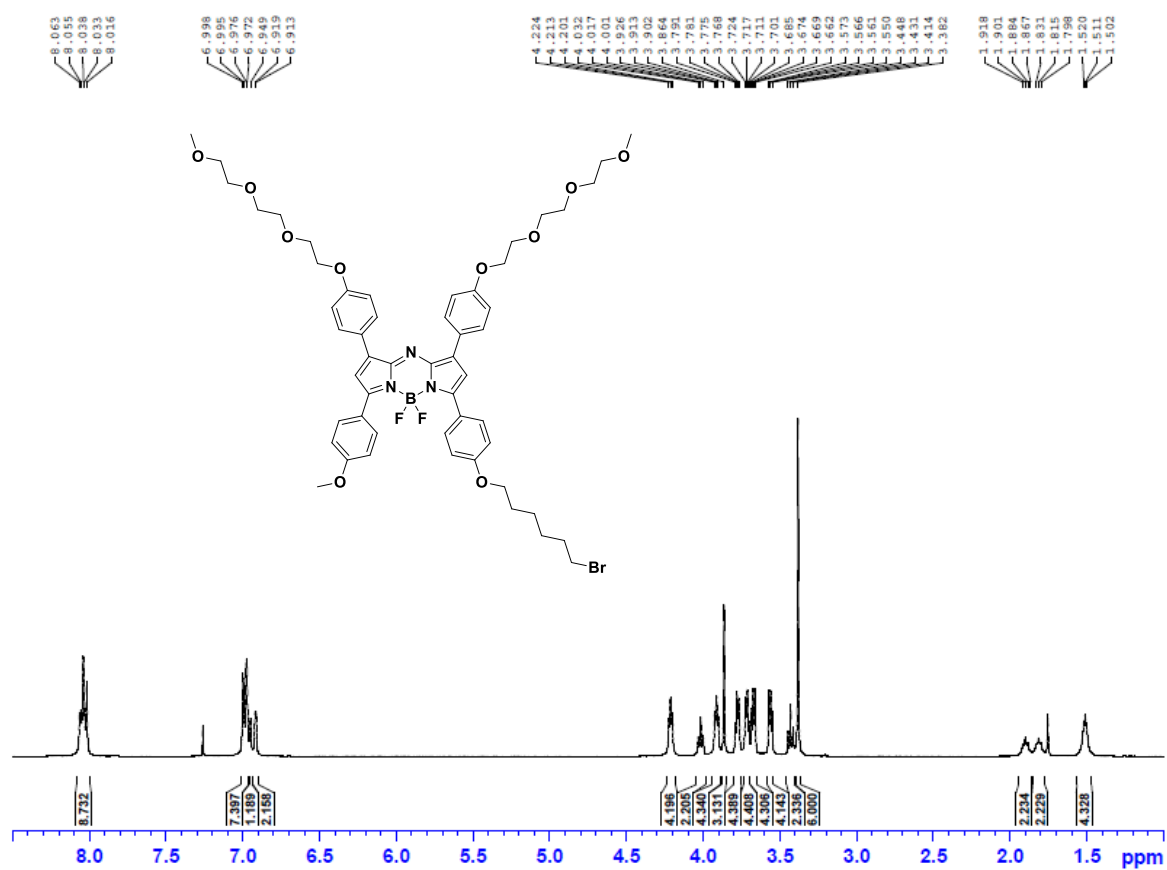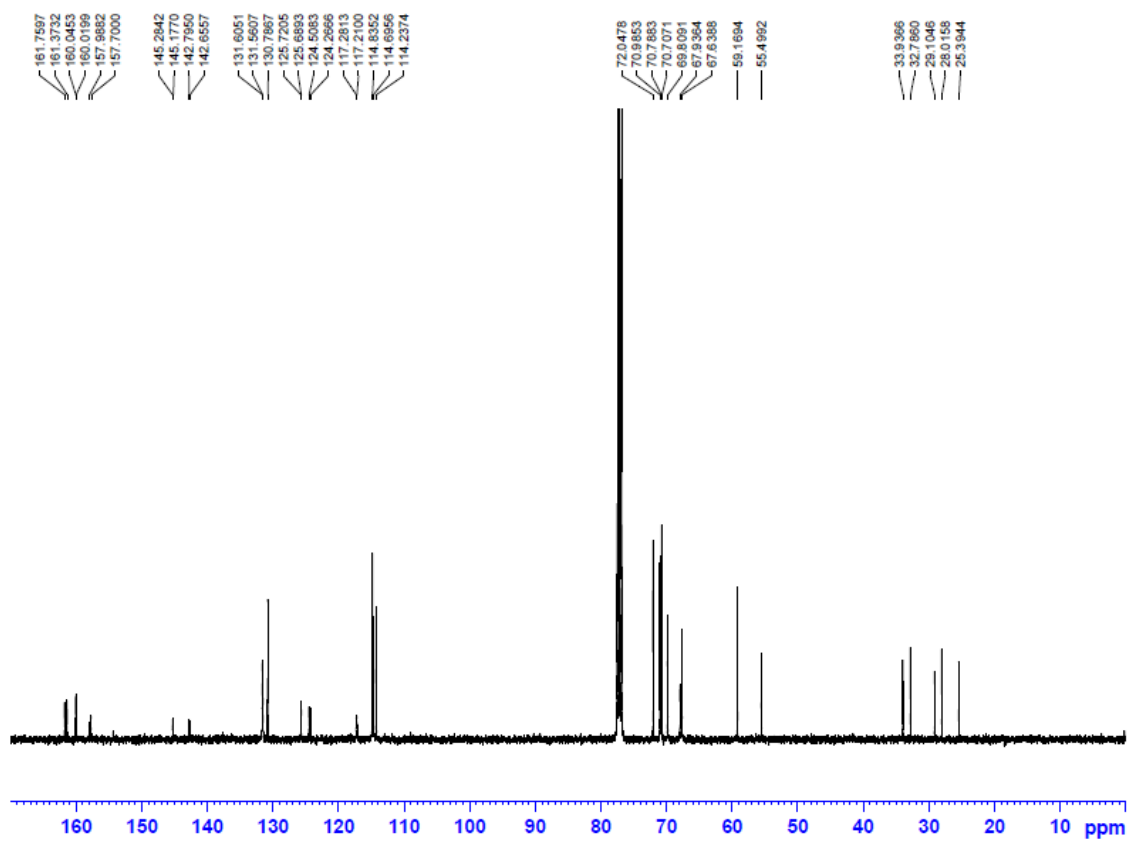

# $^1\text{H}$ and $^{13}\text{C}\{^1\text{H}\}$ NMR spectra of **11** in $\text{CDCl}_3$

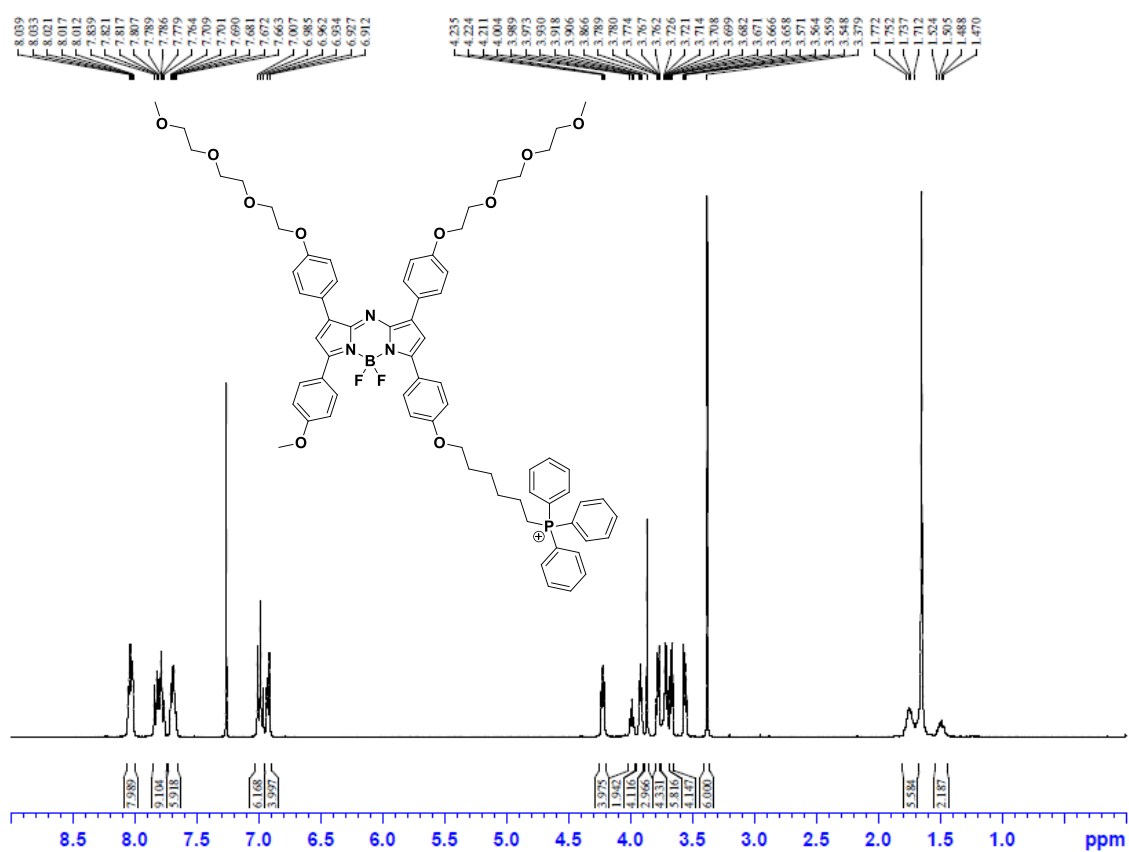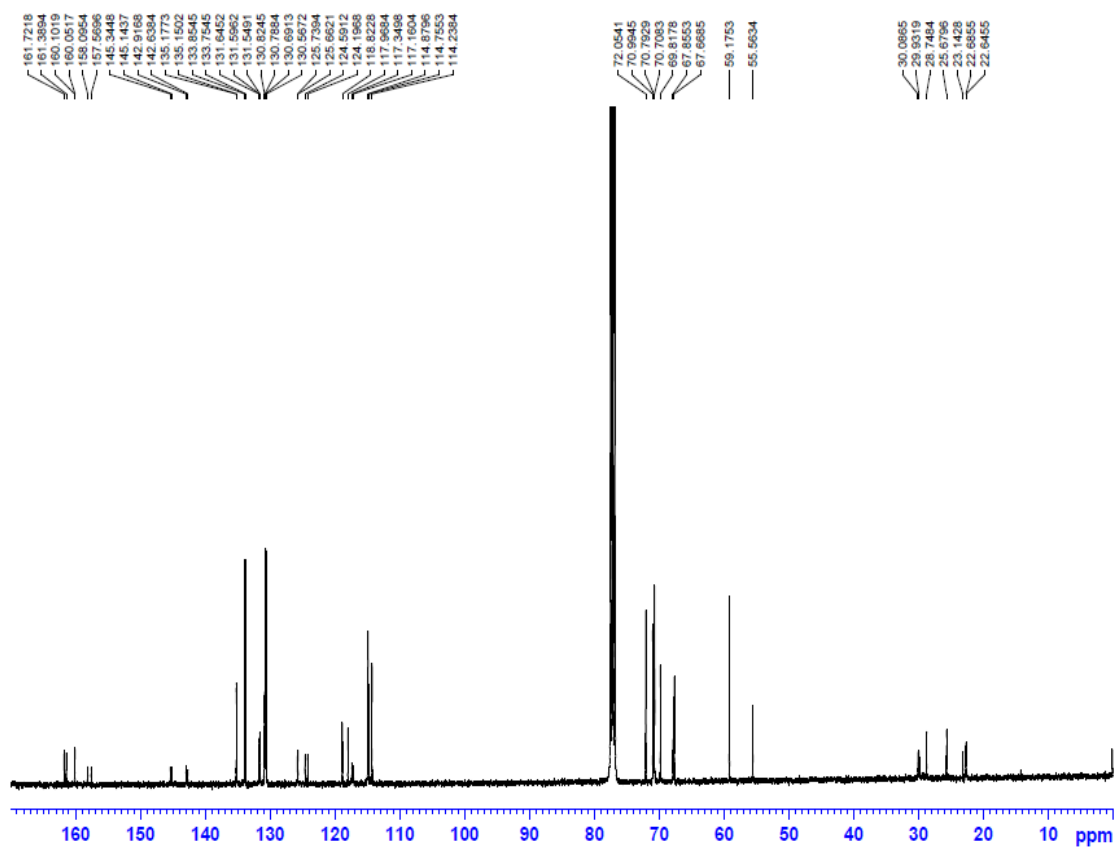

$^1\text{H}$  and  $^{13}\text{C}\{^1\text{H}\}$  NMR spectra of **12** in  $\text{CDCl}_3$

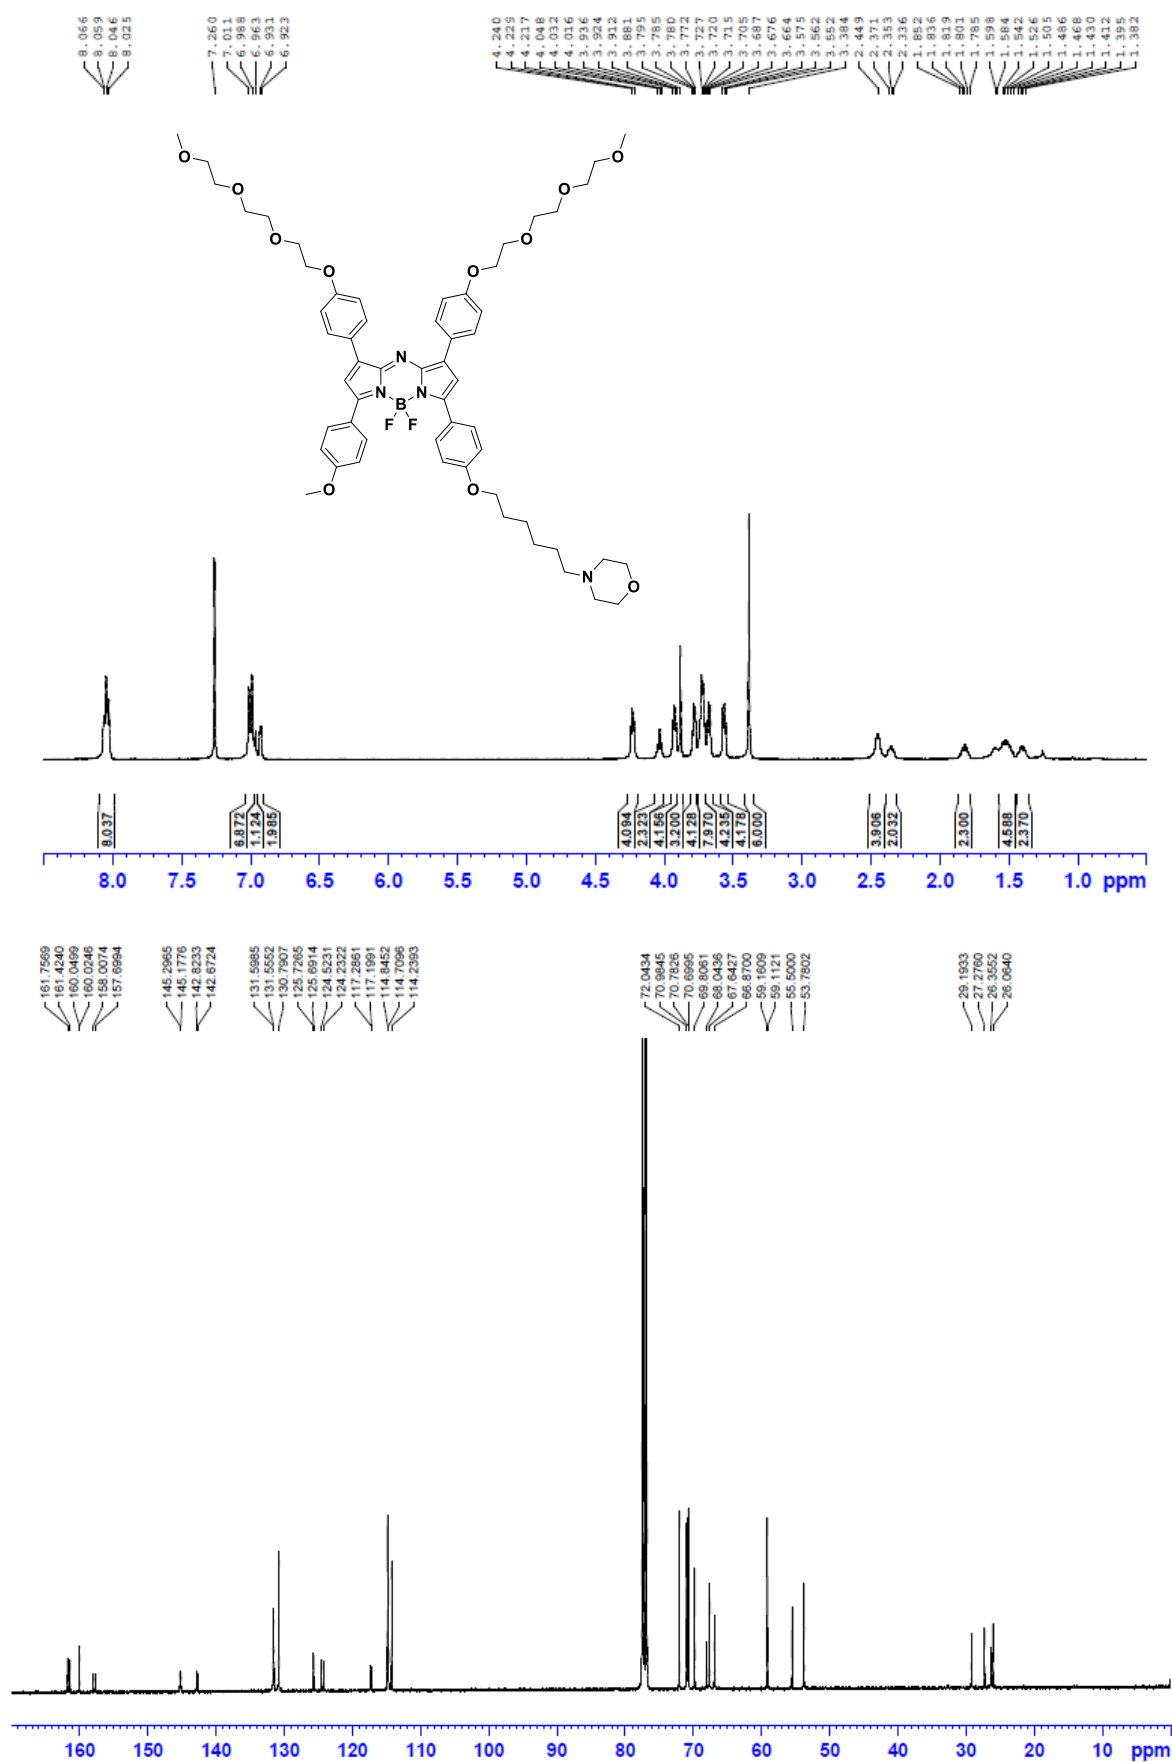



$^1\text{H}$  and  $^{13}\text{C}\{^1\text{H}\}$  NMR spectra of **13** in  $\text{CDCl}_3$

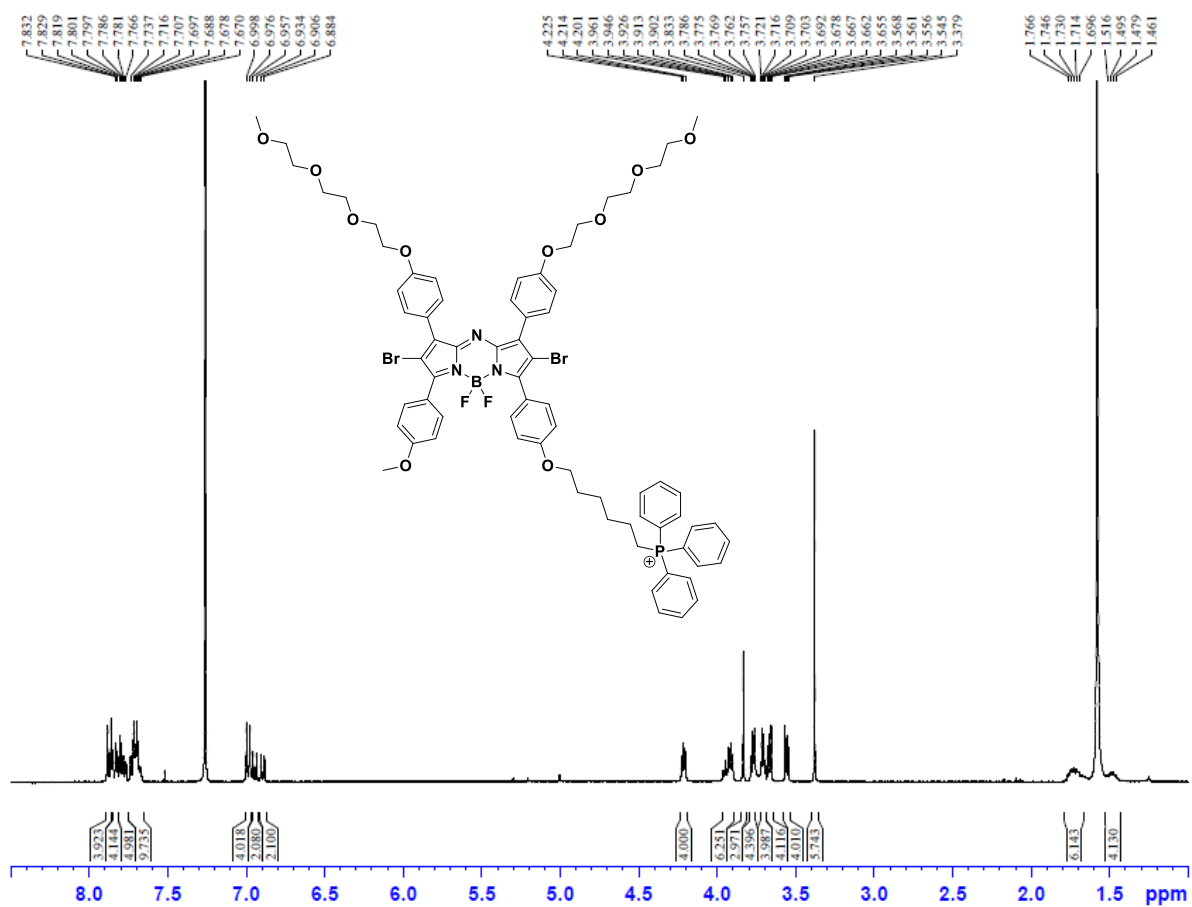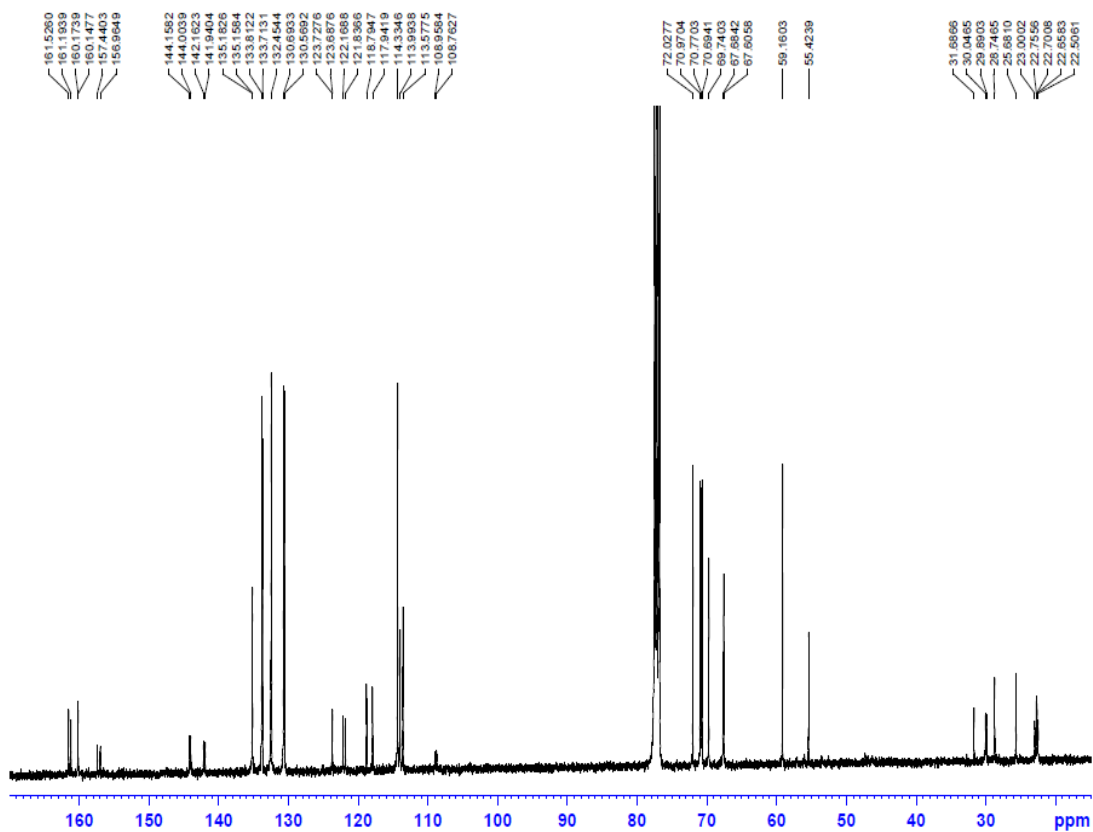

$^1\text{H}$  and  $^{13}\text{C}\{^1\text{H}\}$  NMR spectra of **14** in  $\text{CDCl}_3$

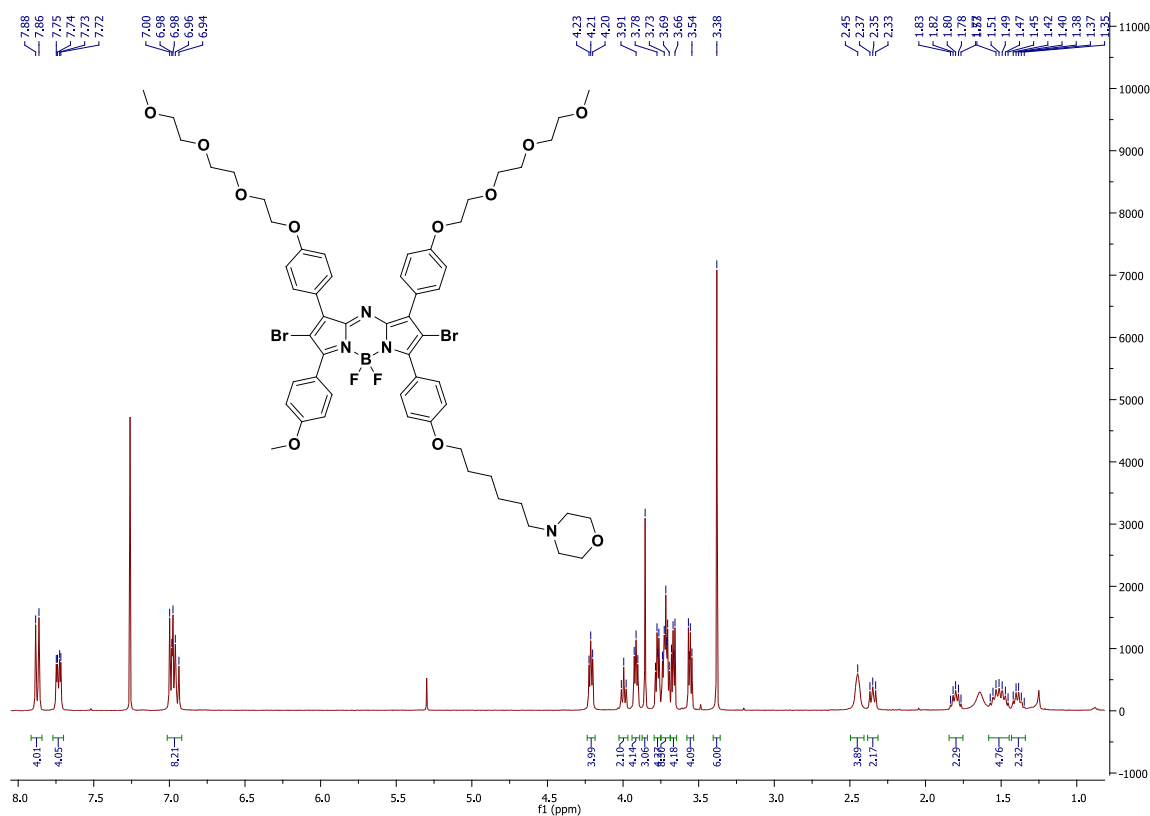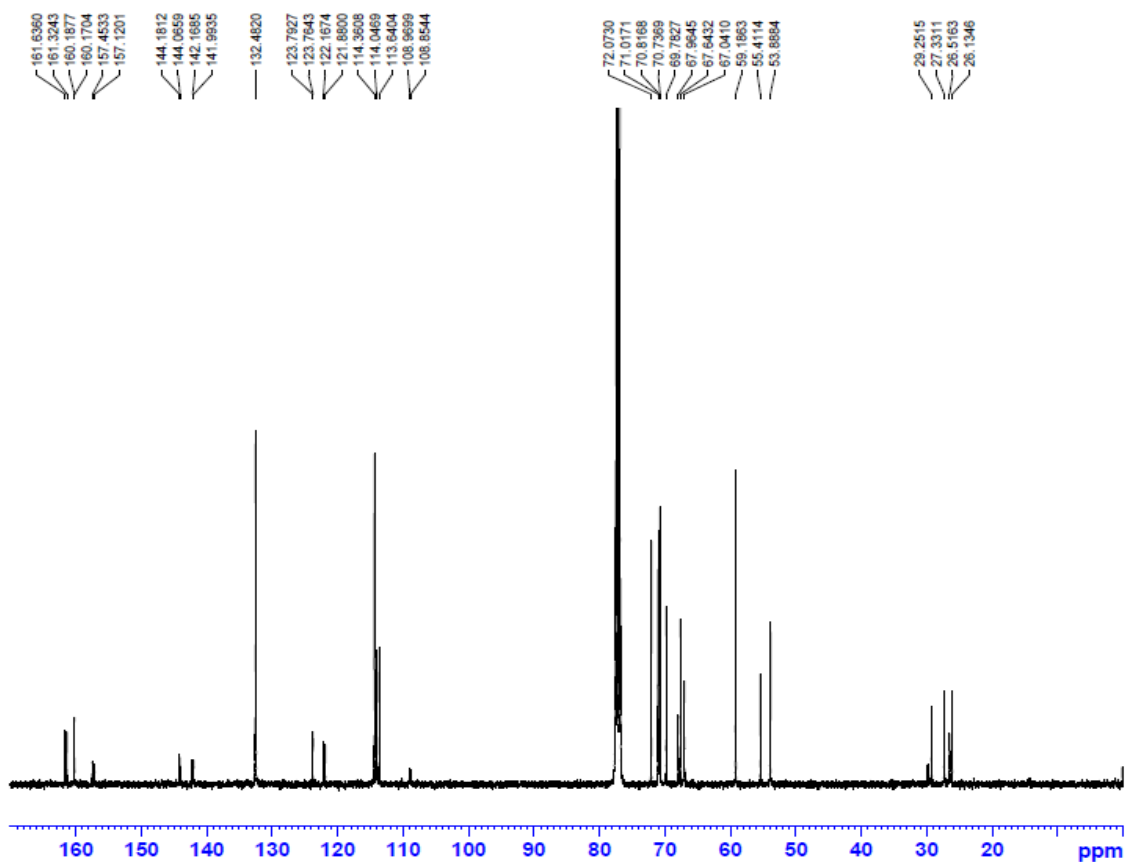

Supplement: c8tb00593a1.pdf [file c8tb00593a1.pdf]
